# Supplementary material for: Local coordination of mRNA storage and degradation near mitochondria modulates C. elegans ageing
Source: PubMed Central journal article supplement — EMBO J. 2023 Jul 10;42(16):e112446. doi: 10.15252/embj.2022112446 (PMC10425844; doi:10.15252/embj.2022112446), 2023-07-10
Supplement: EMBJ-42-e112446-s003.pdf [file EMBJ-42-e112446-s003.pdf]

# Table of Contents

## Appendix Figures S1-S23 & Figure legends

| FIGURE              | LEGEND                                                                                                                                      |
|---------------------|---------------------------------------------------------------------------------------------------------------------------------------------|
| Appendix Figure S1  | Association of DCAP-1-foci with mitochondria is age-dependent                                                                               |
| Appendix Figure S2  | Association of DCAP-2-foci with mitochondria is age-dependent                                                                               |
| Appendix Figure S3  | Association of CCF-1-foci with mitochondria is age-dependent                                                                                |
| Appendix Figure S4  | NTL-2 and EDC-3 are coordinately associated with mitochondria in an age-dependent manner                                                    |
| Appendix Figure S5  | NTL-2 and EDC-3 become tightly associated with mitochondria upon <i>cyc-1</i> genetic inhibition                                            |
| Appendix Figure S6  | Association of NTL-2- and EDC-3-foci with mitochondria in long- and short- lived animals deviates from their wild type counterparts         |
| Appendix Figure S7  | Components of the CCR4-NOT and the mRNA degradation complexes alter mtROS production                                                        |
| Appendix Figure S8  | Components of the CCR4-NOT and the mRNA degradation complexes alter mitochondrial membrane potential $\Delta\psi$                           |
| Appendix Figure S9  | Components of the CCR4-NOT and the mRNA degradation complexes alter mitochondrial ATP levels                                                |
| Appendix Figure S10 | Components of the mRNA degradation complex alter basal and maximal oxygen consumption rates (OCRs)                                          |
| Appendix Figure S11 | Components of the CCR4-NOT and the mRNA degradation complexes alter intestinal mitochondrial abundance                                      |
| Appendix Figure S12 | Components of the CCR4-NOT and the mRNA degradation complexes alter <i>gst-4</i> promoter expression in a SKN-1-dependent manner            |
| Appendix Figure S13 | Perturbation of the CCR4-NOT and the mRNA degradation complexes alters <i>gst-4</i> promoter expression                                     |
| Appendix Figure S14 | Components of the CCR4-NOT and the mRNA degradation complexes localize in distinct foci                                                     |
| Appendix Figure S15 | Genetic inhibition of the one type of body triggers an elevation in the protein abundance of components of the other type                   |
| Appendix Figure S16 | Quantification of total protein content in 1-day-old whole worm lysates under control conditions and upon inhibition of the indicated genes |
| Appendix Figure S17 | NTL-2 preferentially binds MTPTs and their association is affected by age, mitochondrial stress and genetic inhibition of <i>dcap-2</i>     |
| Appendix Figure S18 | Association of storage and degradation bodies with mitochondria is oppositely affected by genetic inhibition of <i>dcap-2</i>               |
| Appendix Figure S19 | TOMM-20 levels increase upon genetic inhibition of storage body components                                                                  |
| Appendix Figure S20 | Knockdown of <i>ntl-2</i> increases MTPT protein levels in a TOMM-20- and AKAP-1-dependent manner                                           |

**A**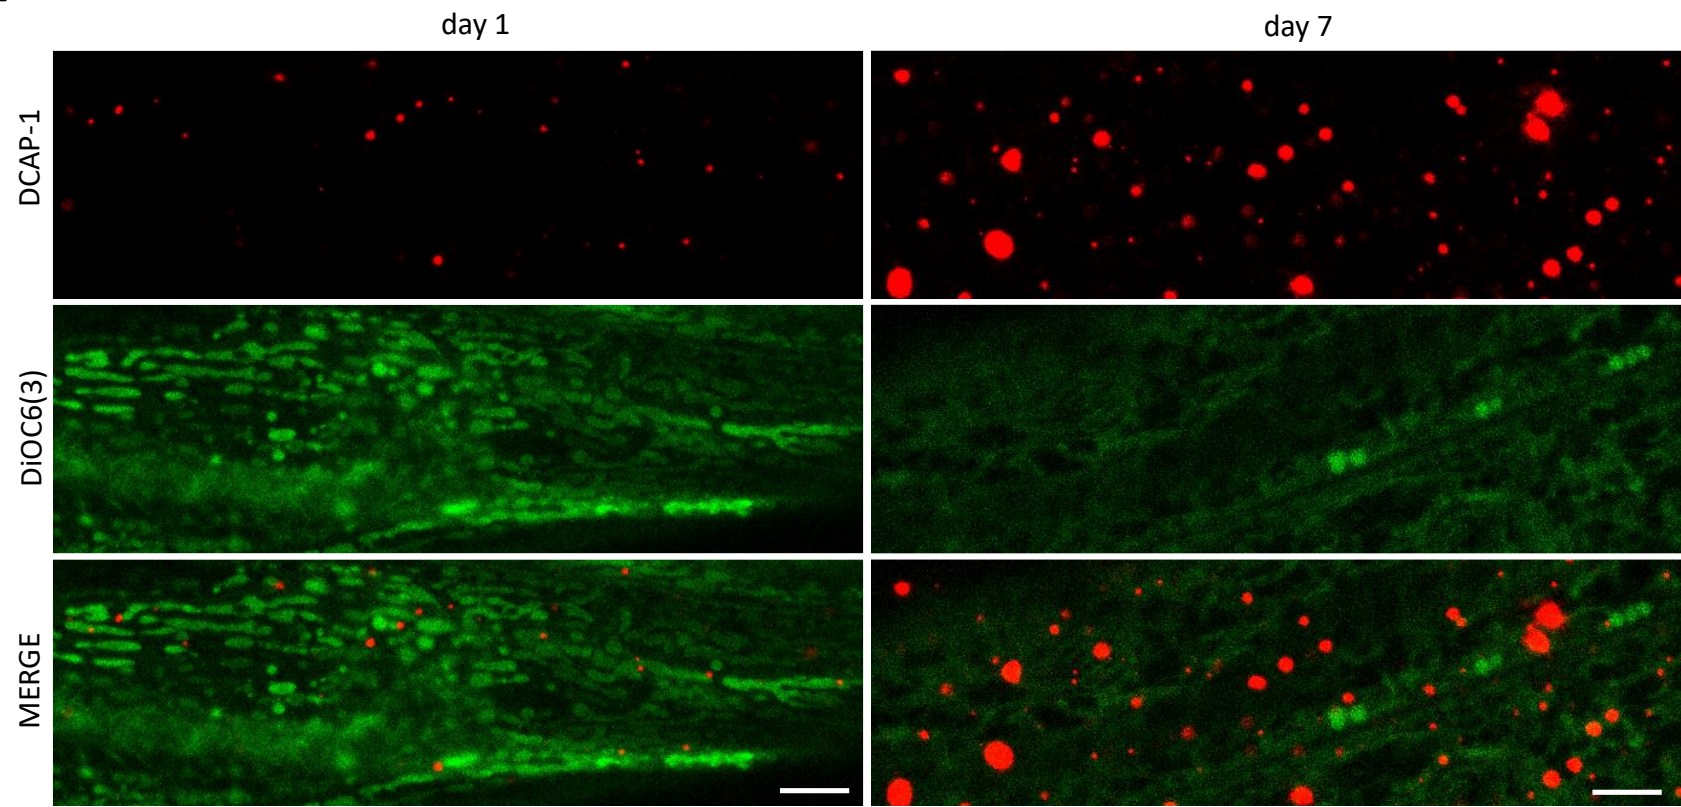**B**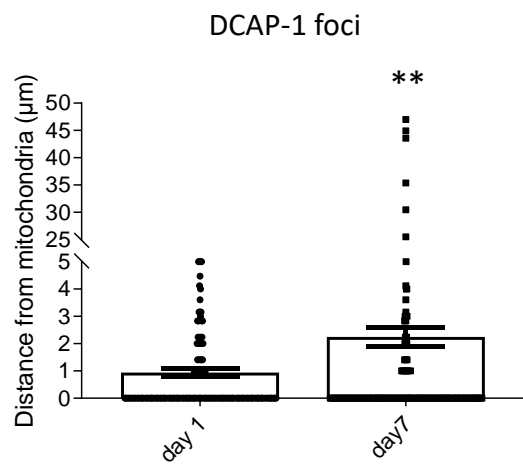**Appendix Fig S1**

**Appendix Figure S1 - Association of DCAP-1-foci with mitochondria is age-dependent. A** Representative images showing the localization of DCAP-1-foci relative to mitochondria in young versus older animals (red: DCAP-1, green: DiOC6(3), a mitochondrial-specific dye; n=2 independent experiments). **B** Quantification of the distances between DCAP-1-foci and mitochondria in young versus older animals (n=2 independent experiments with at least 40 animals/experiment; \*\*P<0.01; two-tailed unpaired t-test).

Data information: Scale bars, 10 $\mu$ m. Images were acquired using a X63 objective lens. Error bars denote SEM.

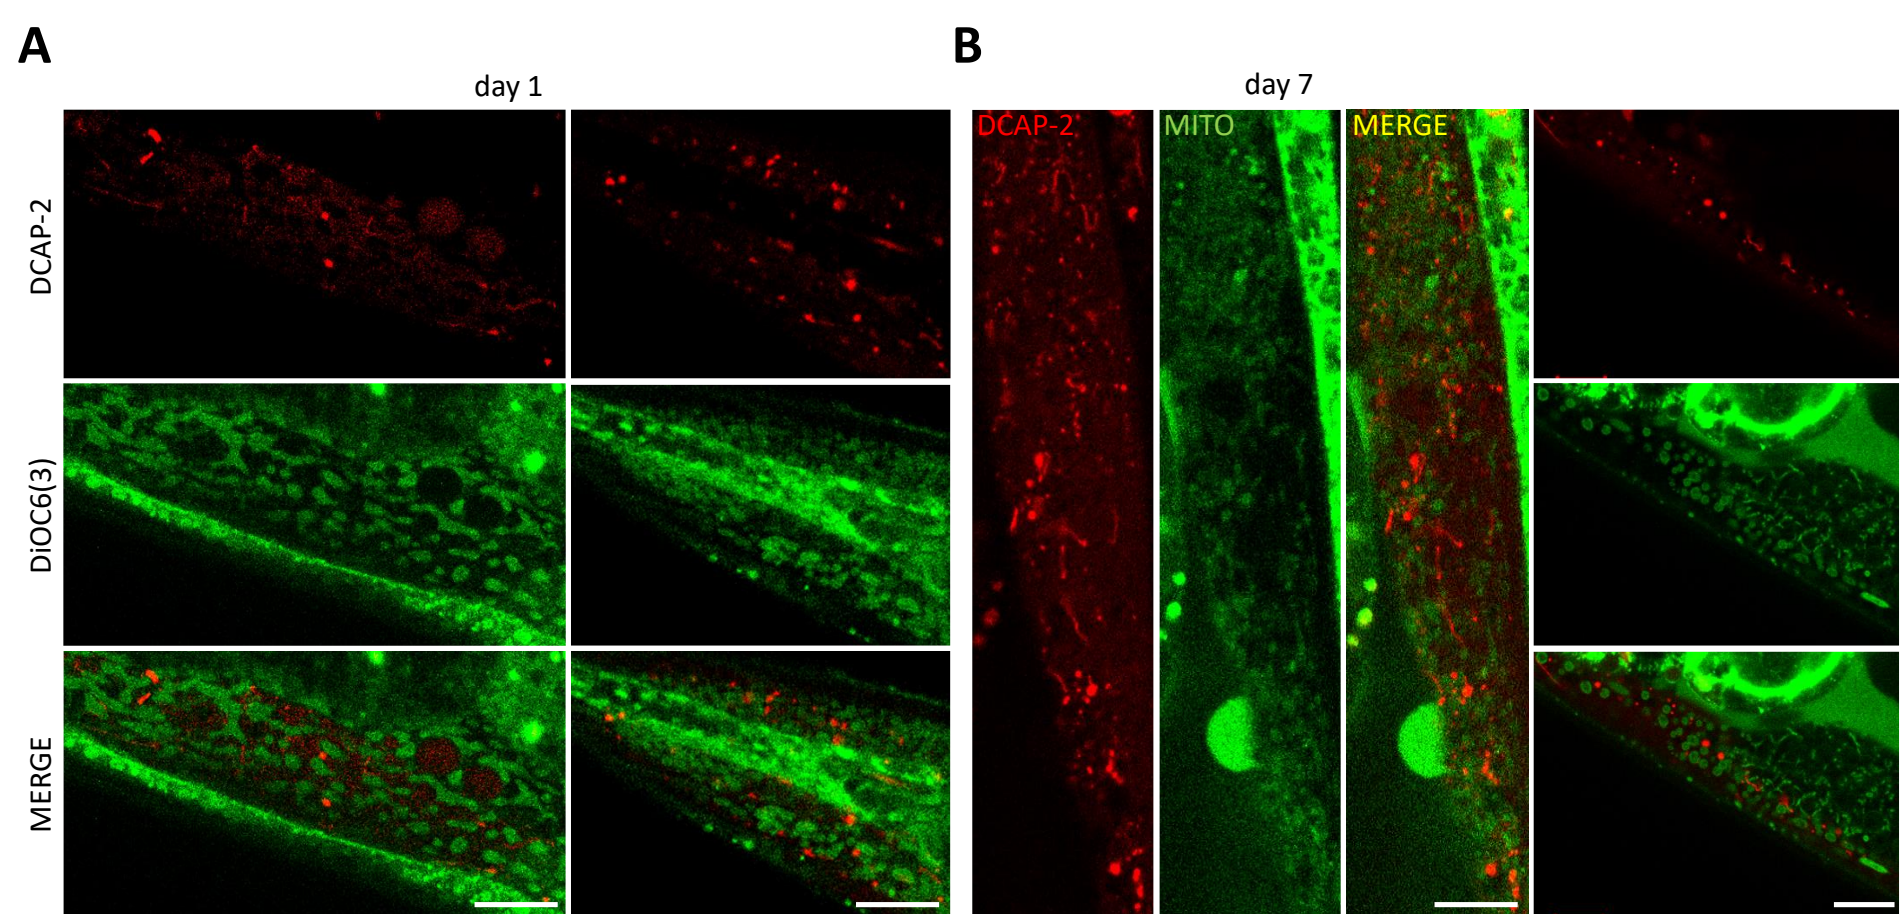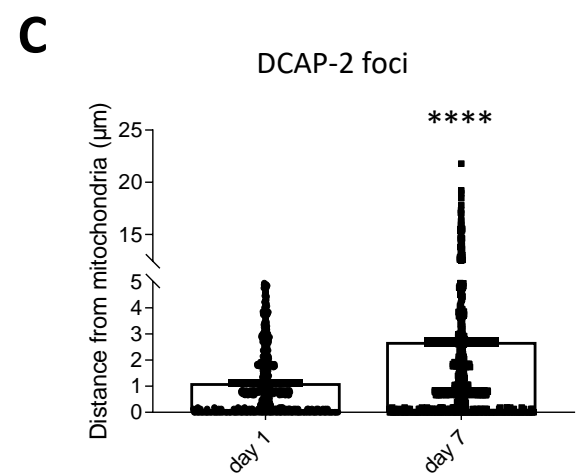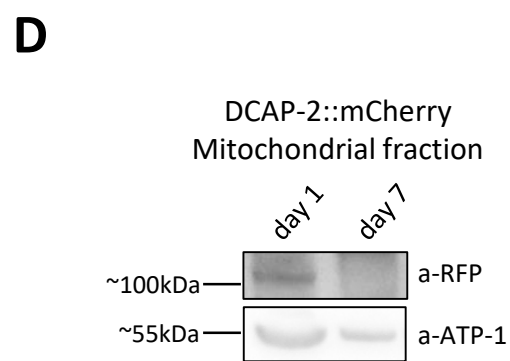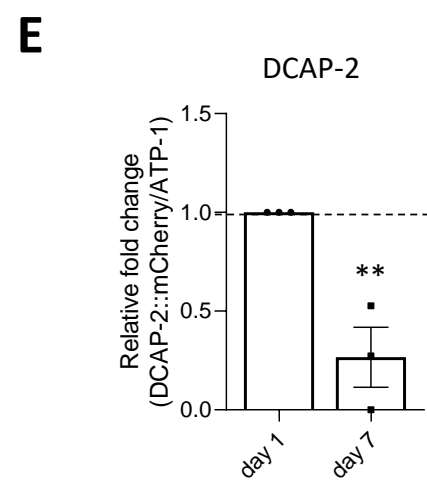

Appendix Fig S2

**Appendix Figure S2 - Association of DCAP-2-foci with mitochondria is age-dependent.** Representative images showing the localization of DCAP-2-foci relative to mitochondria in **A**, young versus **B**, old animals (red: DCAP-2, green: DiOC6(3), a mitochondrial-specific dye; n=2 independent experiments). **C**, Quantification of the distances between DCAP-2-foci and mitochondria in young versus old animals (n=2 independent experiments with at least 40 animals/experiment; \*\*\*\*P<0.0001; two-tailed unpaired t-test). **D**, Representative image from Immunoblot analysis showing that DCAP-2 is less associated with mitochondria during ageing and **E**, Respective quantification showing DCAP-2 levels normalized to ATP-1 (n=3 independent experiments, \*\*P<0.01; two-tailed unpaired t-test).

Data information: Scale bars, 10µm. Images were acquired using a X63 objective lens. Error bars denote SEM.

**A**

day 1

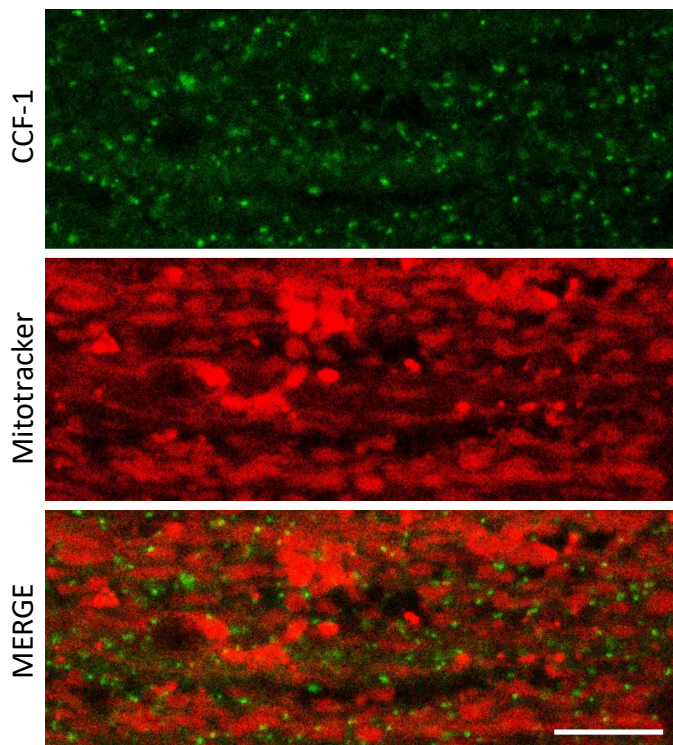**B**

day 7

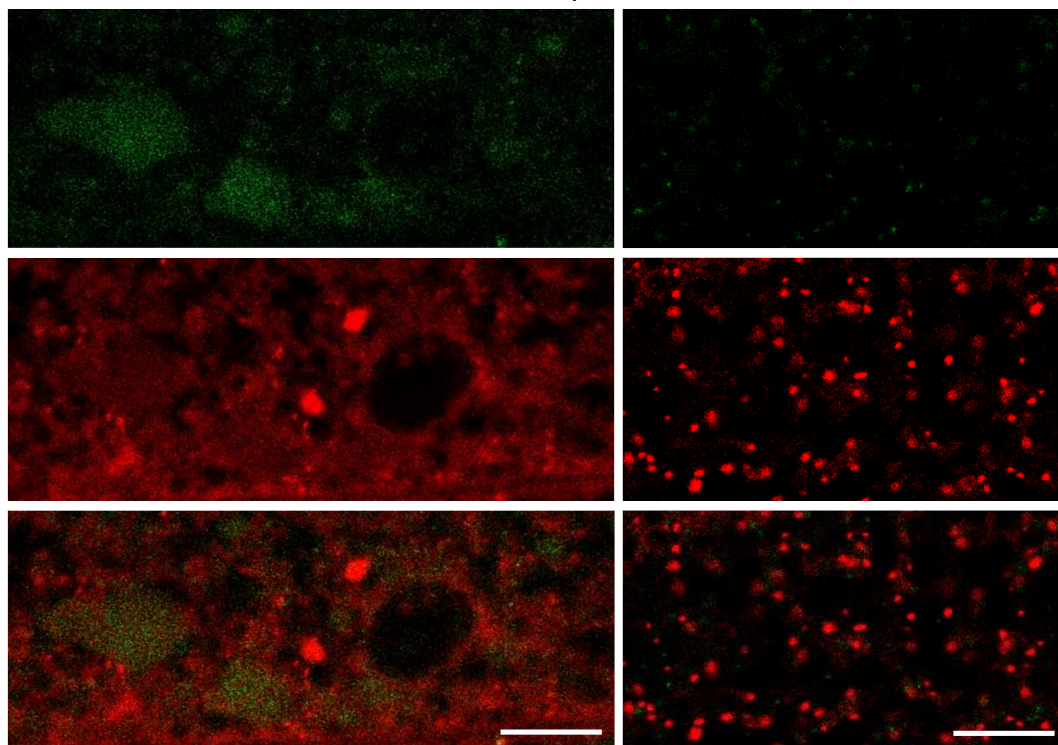**C**

CCF-1 foci

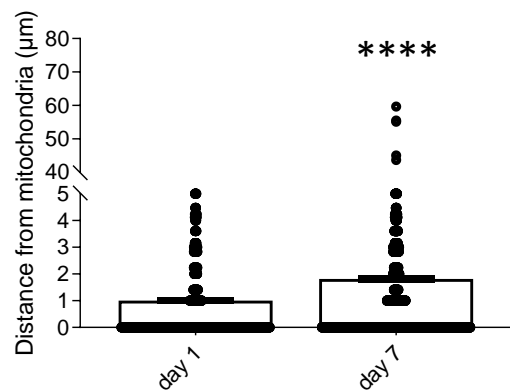**D**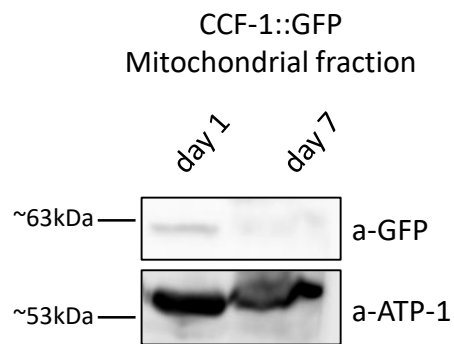**E**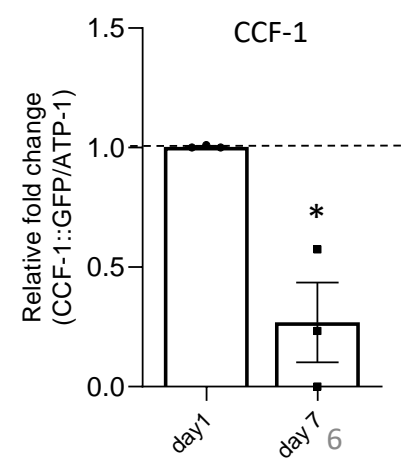

Appendix Fig S3

**Appendix Figure S3 - Association of CCF-1-foci with mitochondria is age-dependent.** Representative images showing the localization of CCF-1-foci relative to mitochondria in **A**, young (1-day-old) versus **B**, old (7-day-old) animals (image in control is reused in Fig EV2E as conditions indicated in Appendix Fig S3A & Fig EV2E are part of the same experimental setup) (green: CCF-1, red: Mitotracker Deep Red FM, a mitochondrial-specific dye; n=2 independent experiments). **C**, Quantification of the distances CCF-1-foci obtain from mitochondria in young versus old animals (n=2 independent experiments with at least 40 animals/experiment; \*\*\*\*P<0.0001; two-tailed unpaired t-test). **D**, Representative image from Immunoblot analysis showing that CCF-1 is less associated with mitochondria in older animals compared to younger worms and **E**, Respective quantification of CCF-1 levels normalized to ATP-1 (n=3 independent experiments; \*P<0.05; two-tailed unpaired t-test). Data information: Scale bars, 10µm. Images were acquired using a X63 objective lens. Error bars denote SEM.

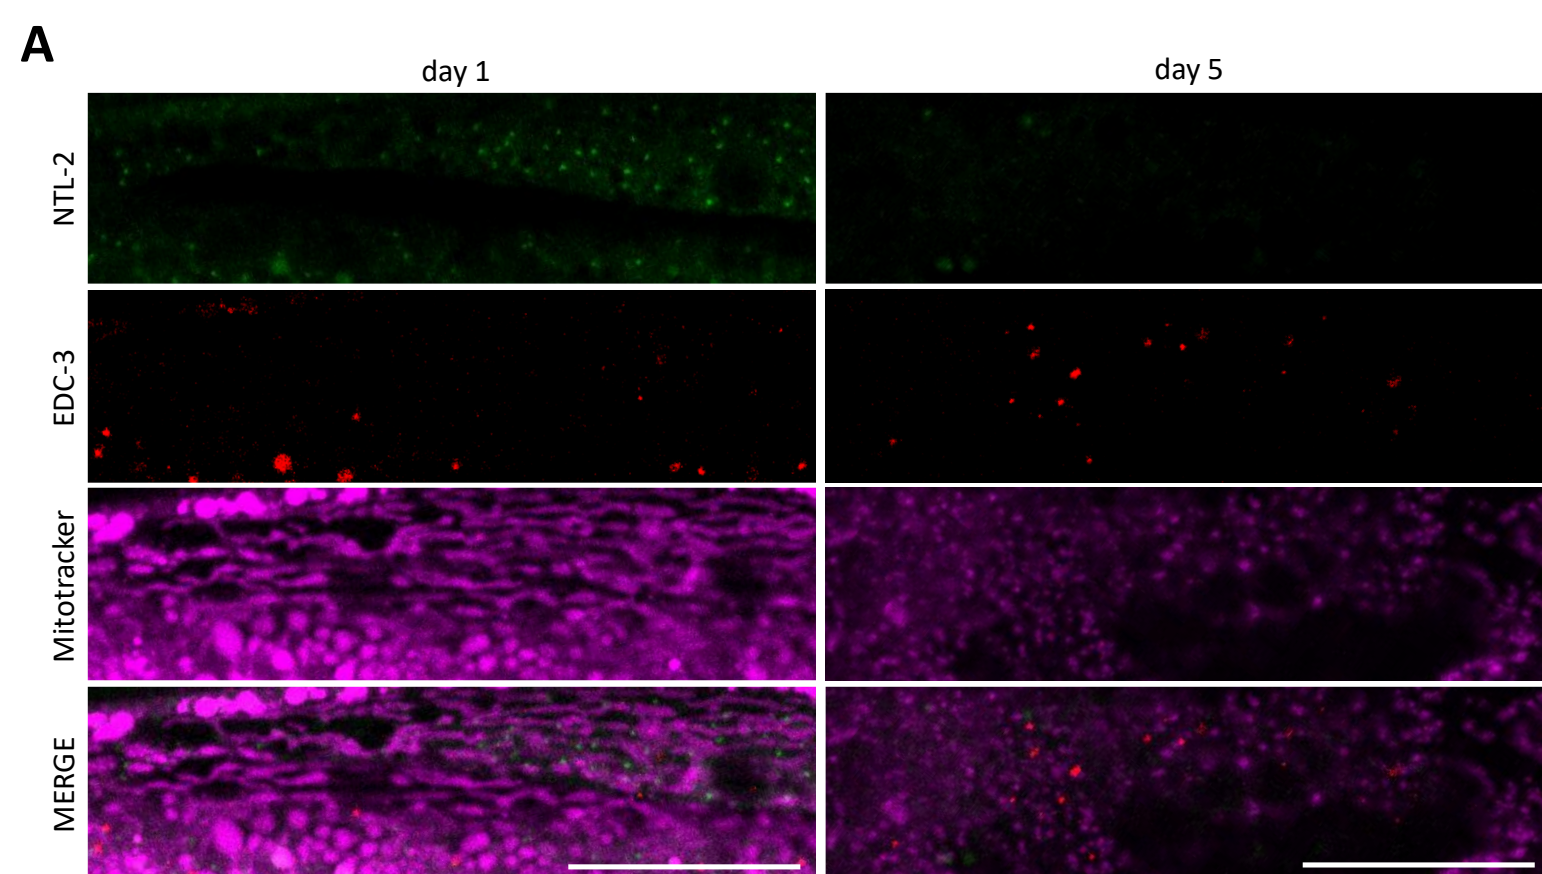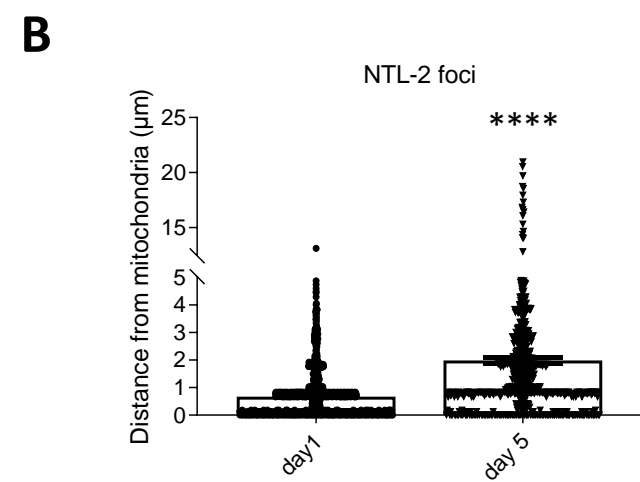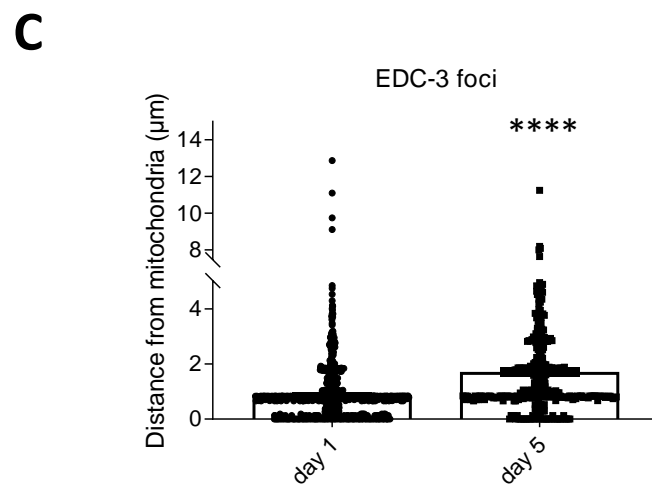

Appendix Fig S4



**Appendix Figure S4 - NTL-2 and EDC-3 are coordinately associated with mitochondria in an age-dependent manner.** Representative images showing the localization of NTL-2-foci and EDC-3-foci relative to mitochondria in **A**, young versus older animals (green: NTL-2, red: EDC-3, purple: Mitotracker Deep Red FM, a mitochondrial-specific dye). **B**, Quantification of the distances NTL-2- and **C**, EDC-3-foci obtain from mitochondria in young and older animals (n=3 independent experiments with at least 30 animals/experiment; \*\*\*\*P<0.0001; two-tailed unpaired t-test).

Data information: Scale bars, 20  $\mu\text{m}$ . Images were acquired using a X63 objective lens. Error bars denote SEM.

**A**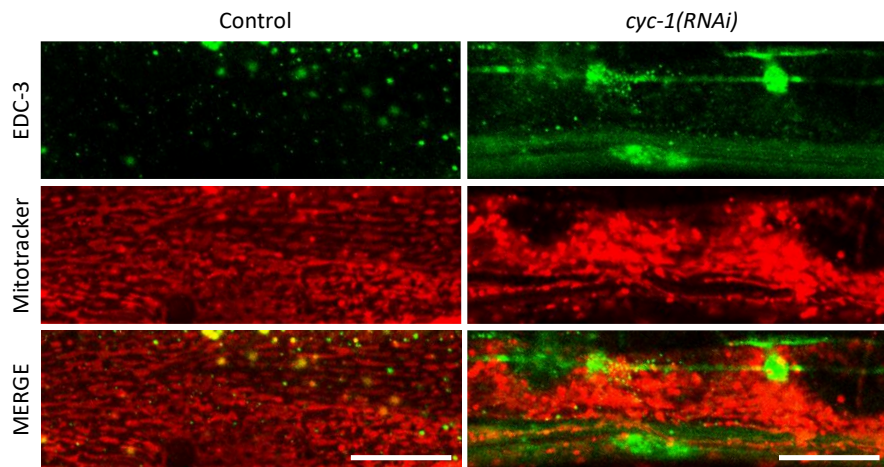**B**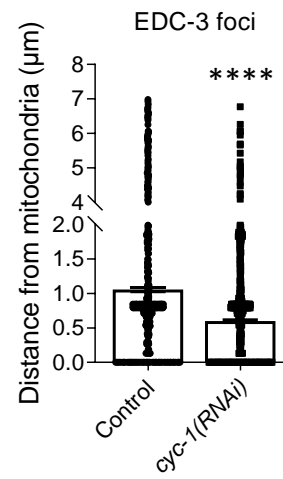**C**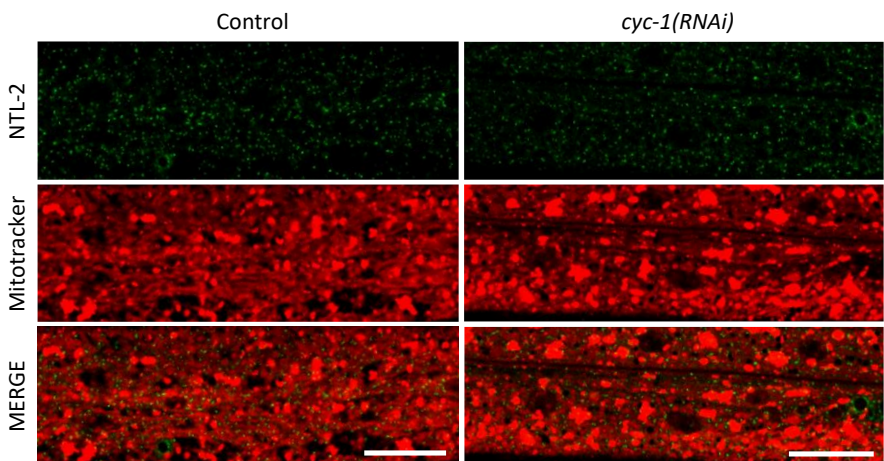**D**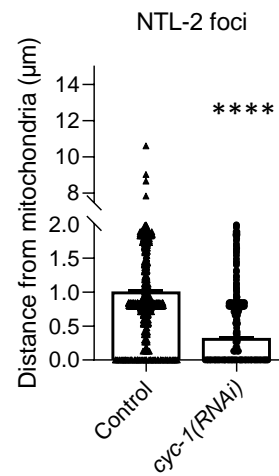

**Appendix Figure S5 - NTL-2 and EDC-3 become tightly associated with mitochondria upon *cyc-1* genetic inhibition. A**, Representative images showing the localization of EDC-3-foci relative to mitochondria upon genetic inhibition of *cyc-1* (green: EDC-3, red: Mitotracker Deep Red FM, a mitochondria-specific dye). **B**, Quantification of the distances between EDC-3-foci and mitochondria upon genetic inhibition of *cyc-1* (n=3 independent experiments with at least 30 animals/experiment; \*\*\*\*P<0.0001; unpaired two-tailed t test). **C**, Representative images showing the localization of NTL-2-foci relative to mitochondria upon genetic inhibition of *cyc-1* (green: NTL-2, red: Mitotracker Deep Red FM, a mitochondria-specific dye). **D**, Quantification of the distances between NTL-2-foci and mitochondria upon genetic inhibition of *cyc-1* (n=3 independent experiments with at least 30 animals/experiment; \*\*\*\*P<0.0001; two-tailed unpaired *t*-test).

Data information: Scale bars, 20  $\mu$ m. Images were acquired using a X63 objective lens. Error bars denote SEM.

**A**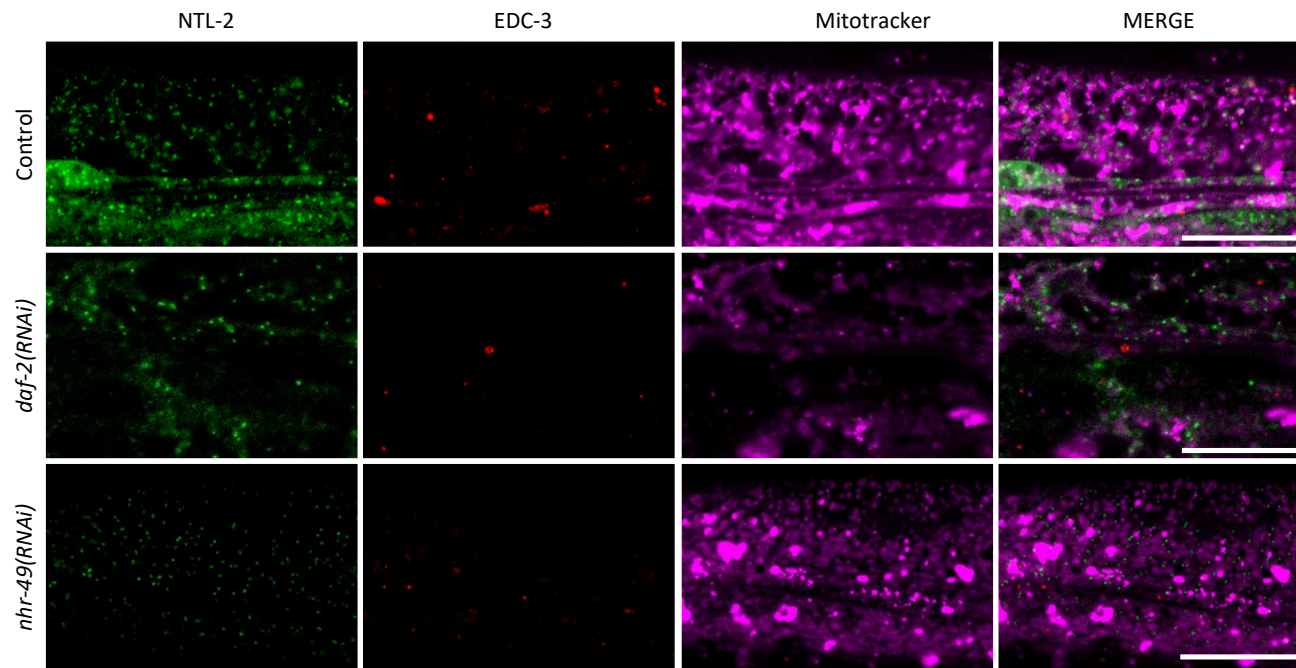**E**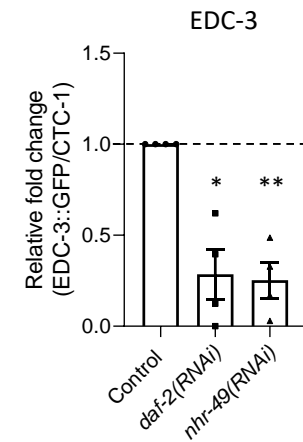**B**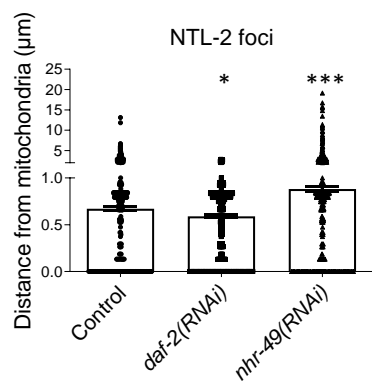**C**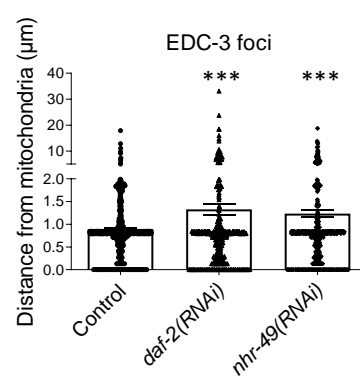**D**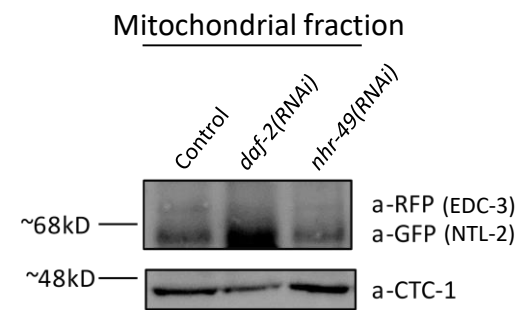**F**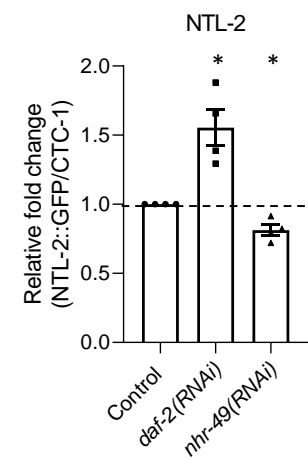

**Appendix Figure S6 - Association of NTL-2- and EDC-3-foci with mitochondria in long- and short- lived animals deviates from their wild-type counterparts.** **A**, Representative images showing the localization of NTL-2- and EDC-3-foci relative to mitochondria upon genetic inhibition of either *daf-2* or *nhr-49* (green: NTL-2, red: EDC-3, purple: Mitotracker Deep Red FM, a mitochondria-specific dye). **B**, Quantification of the distances NTL-2- and **C**, EDC-3-foci obtain from mitochondria upon genetic inhibition of either *daf-2* or *nhr-49* (n=3 independent experiments with at least 45 animals per experiment; \*P<0.05, \*\*\*P<0.001; one-way analysis of variance (ANOVA)). **D**, Immunoblot analysis in isolated mitochondria of 1-day-old animals co-expressing EDC-3 and NTL-2. **E**, Quantification of EDC-3 and **F**, NTL-2 amount in the mitochondrial fraction obtained from animals subjected to the indicated genetic inhibitions compared to controls (n=4 independent experiments; \*P<0.05, \*\*P<0.01; Welch's one-way analysis of variance (ANOVA) followed by Dunnett's T3 multiple comparisons test). All experiments in this Figure have been performed in animals that co-express NTL-2 and EDC-3.

Data information: Scale bars, 20  $\mu$ m. Images were acquired using a X63 objective lens. Error bars denote SEM.

**A**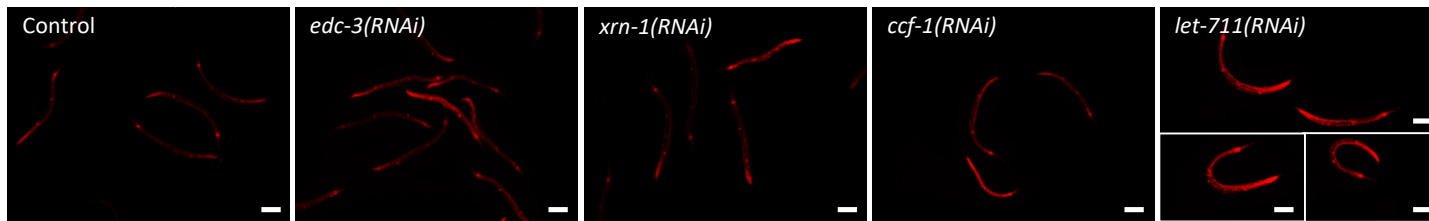**B**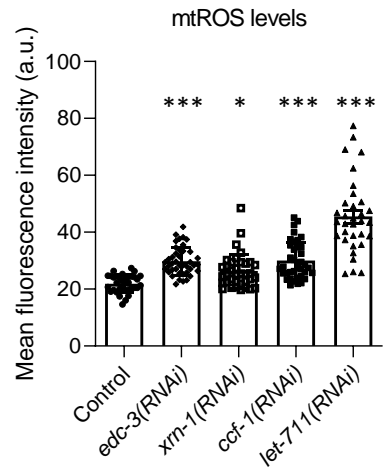

**Appendix Figure S7 - Components of the CCR4-NOT and the mRNA degradation complexes alter mtROS production. A, Mitochondrial**

ROS production is elevated in animals subjected to *edc-3*, *xrn-1*, *ccf-1* or *let-711* RNAi and **B**, Respective quantification is shown (n=3 independent experiments with at least 182 animals/experiment; \*P<0.05, \*\*\*\*P< 0.0001; one-way analysis of variance (ANOVA)).

Data information: Scale bars, 40µm. Images were acquired using a X5 objective lens. Error bars denote SEM.

**A**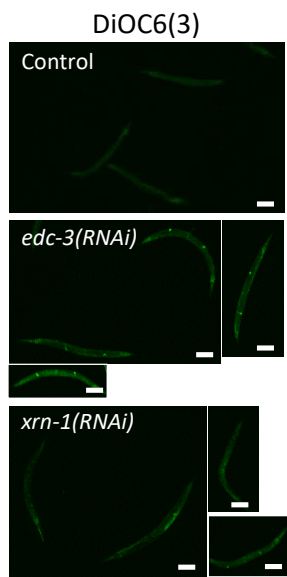**B**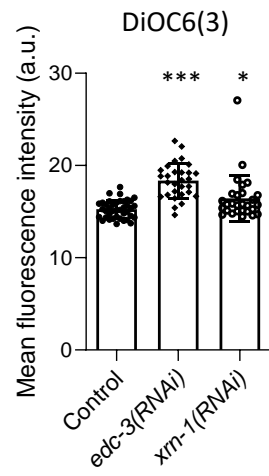**C**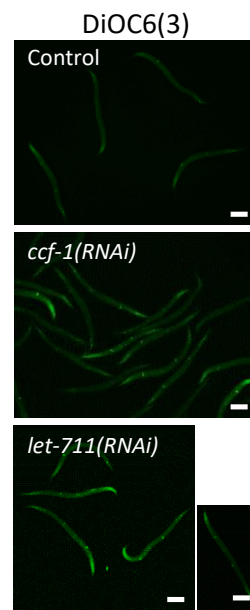**D**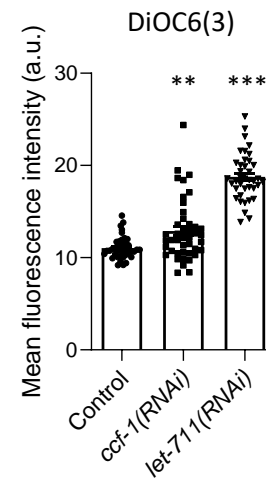



## Appendix Figure S8 - Components of the CCR4-NOT and the mRNA degradation complexes alter mitochondrial membrane potential

**( $\Delta\psi$ ).** **A**, Representative images showing fluorescence intensity of the mitochondrial membrane potential dye DiOC6(3) in 1-day-old animals fed bacteria expressing control, *edc-3* or *xrn-1* RNAi and **B**, Respective quantification (n=3 independent experiments with at least 97 animals/experiment; \*P< 0.05, \*\*\*P< 0.001; one-way analysis of variance (ANOVA)). **C**, Representative images showing fluorescence intensity of the mitochondrial membrane potential dye DiOC6(3) in 1-day-old animals fed bacteria expressing control, *ccf-1* or *let-711* RNAi and **D**, Respective quantification (n=3 independent experiments with at least 124 animals/experiment; \*\*P< 0.01, \*\*\*P< 0.001; one-way analysis of variance (ANOVA)).

Data information: Scale bars, 40 $\mu$ m. Images were acquired using a X4 objective lens. Error bars denote SEM.

**A**

ATP

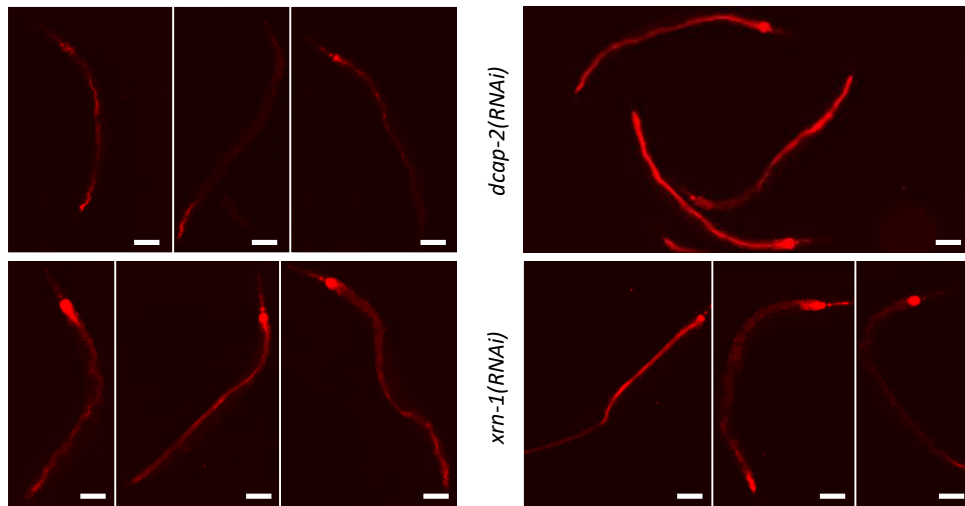**B**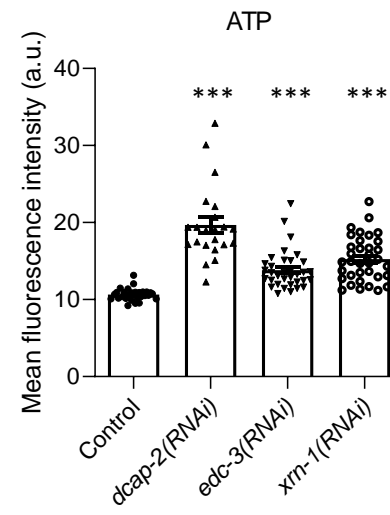**C**

ATP

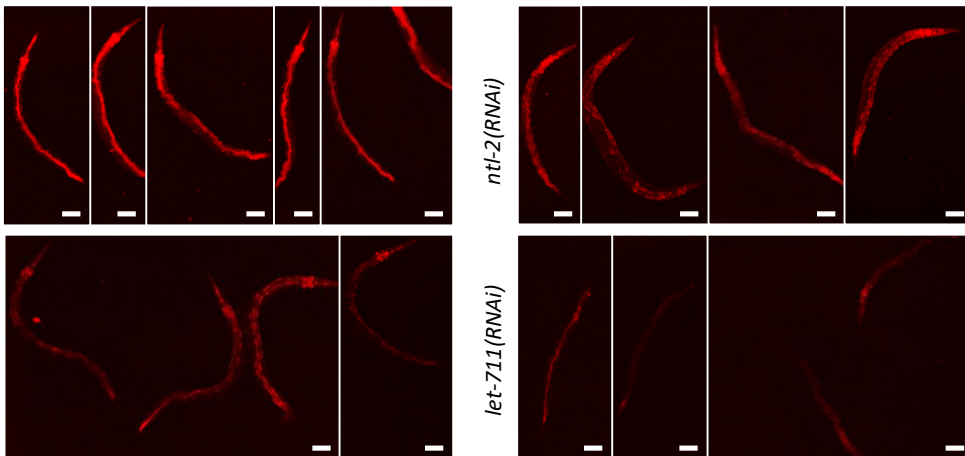**D**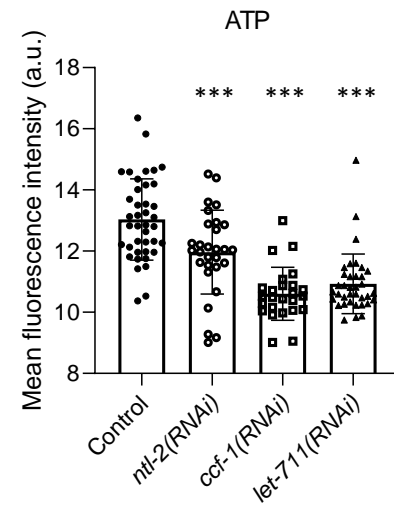

**Appendix Figure S9 - Components of the CCR4-NOT and the mRNA degradation complexes alter mitochondrial ATP levels. A,**

Representative fluorescent images showing mitochondrial ATP levels in young adult animals fed with bacteria expressing control, *edc-3*, *dcap-2* and *xrn-1* RNAis. **B**, Corresponding quantification is shown (n=3 independent experiments with at least 120 animals/experiment; \*\*\*P< 0.001; one-way analysis of variance (ANOVA)). **C**, Representative fluorescent images showing mitochondrial ATP levels in young adult animals fed with bacteria expressing control, *ntl-2*, *ccf-1* and *let-711* RNAis. **D**, Corresponding quantification is shown (n=3 independent experiments with at least 130 animals/experiment; \*\*\*P< 0.001; one-way analysis of variance (ANOVA)). BioTracker ATP-Red was used for *in vivo* monitoring of mitochondrial ATP levels.

Data information: Scale bars, 20µm. Images were acquired using a X4 objective lens. Error bars denote SEM.

**A**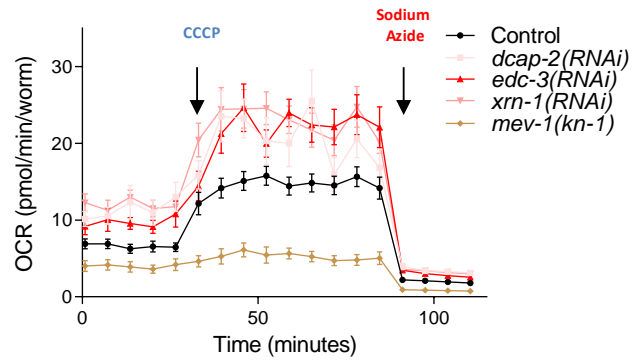**B**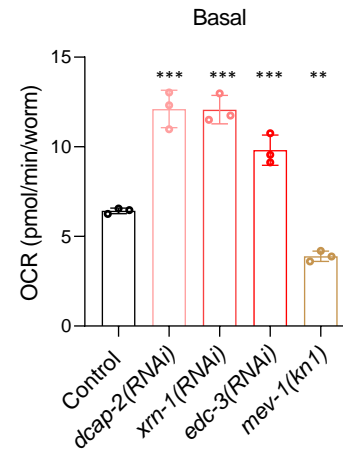**C**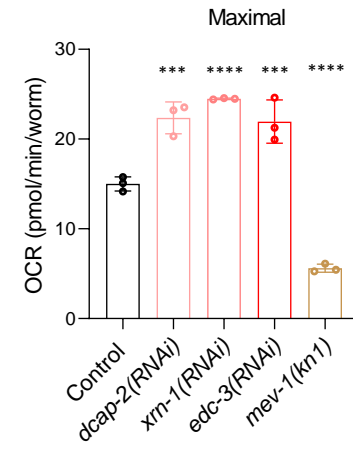

**Appendix Figure S10 - Components of the mRNA degradation complex alter basal and maximal oxygen consumption rates (OCRs).** **A**, Normalized OCRs profile plot versus time. **B**, Basal OCR per worm was measured at time points 3-5; before CCCP injection. **C**, Maximal OCR per worm was measured at time points 7-9 between CCCP and sodium azide injections. Seahorse XF analyzer was used to measure oxygen consumption rate (OCR) following a sequential injection of CCCP and sodium azide at the indicated time points. (n=2 independent experiments; \*\*P< 0.01, \*\*\*P< 0.001, \*\*\*\*P<0.0001; one-way analysis of variance (ANOVA) followed by Dunnett's multiple comparison test).

Data information: Error bars denote SEM.

**A** $p_{ges-1}$ mtGFP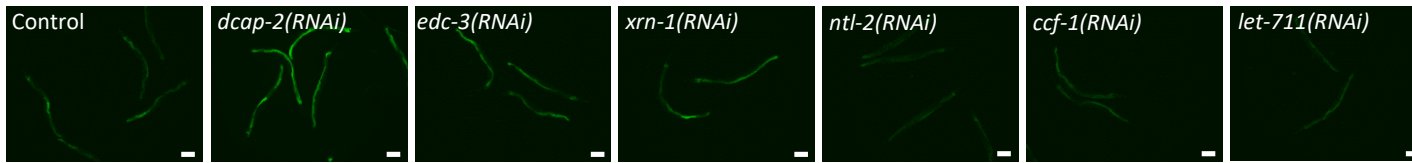**B**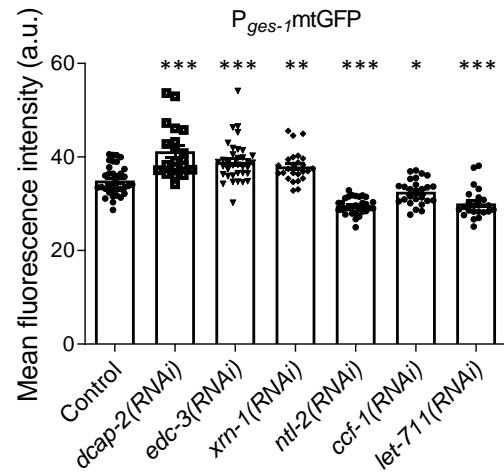

**Appendix Figure S11 - Components of the CCR4-NOT and the mRNA degradation complexes alter intestinal mitochondrial abundance.**

**A**, Representative images showing the effect of the indicated genetic inhibitions on the abundance of intestinal cell mitochondria in 1-day-old nematodes. **B**, Respective quantification is shown. (n=3 independent experiments with at least 194 animals/experiment; \*P< 0.05, \*\*P< 0.01, \*\*\*P< 0.001; one-way analysis of variance (ANOVA)).

Data information: Scale bars, 40µm. Images were acquired using a X4 objective lens. Error bars denote SEM.

**A**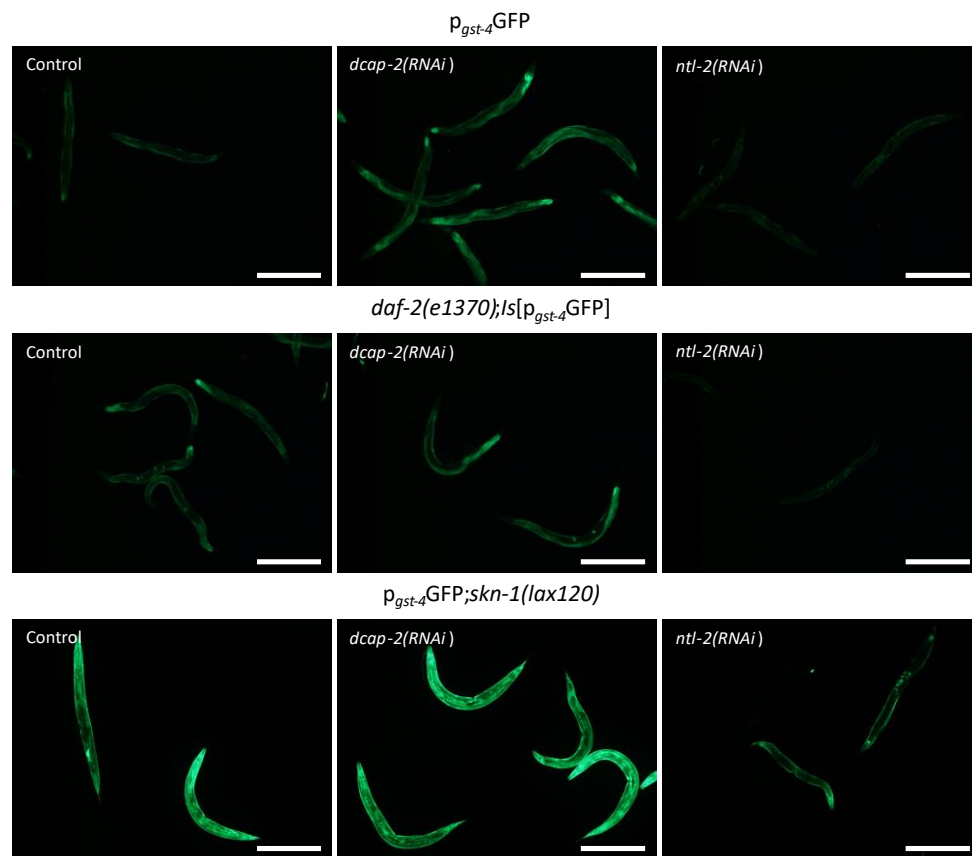**B**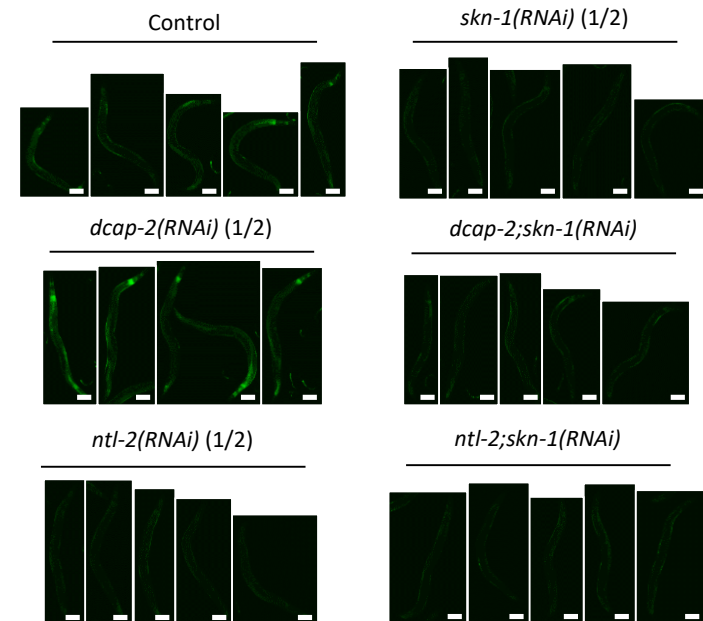**C**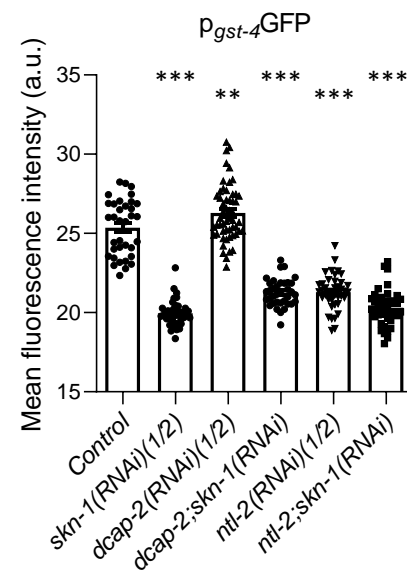



**Appendix Figure S12 - Components of the CCR4-NOT and the mRNA degradation complexes alter *gst-4* promoter expression in a SKN-1-dependent manner.** **A**, Representative images corresponding to quantification shown in Fig 3C, Scale bars, 50 $\mu$ m. Images were acquired using a X5 objective lens. **B**, Representative images showing the expression levels of p<sub>*gst-4*</sub>GFP in 1-day-old animals upon the indicated RNAi treatments diluted 1:1 and **C**, Respective quantification (n=3 independent experiments with at least 244 animals/experiment; \*\*P<0,01, \*\*\*P<0.001; one-way analysis of variance (ANOVA)).

Data information: Scale bars, 20 $\mu$ m. Images were acquired using X5 and X4 objective lenses. Error bars denote SEM.

**A** $p_{gst-4}$ GFP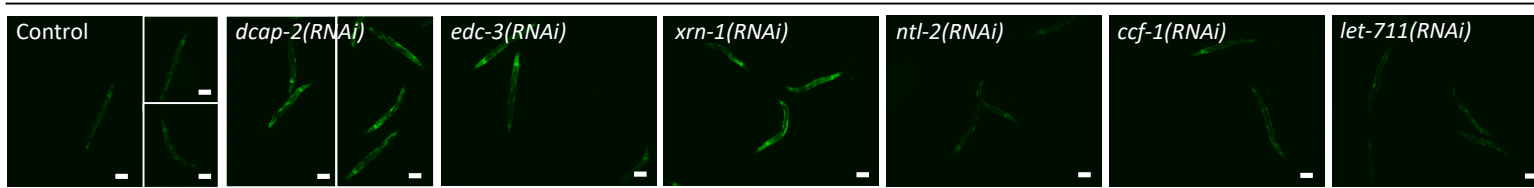**B**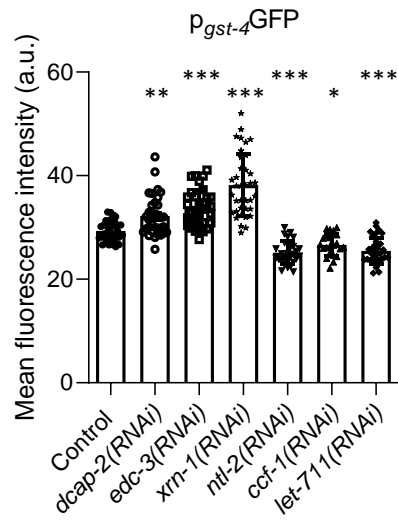

**Appendix Figure S13 - Perturbation of the CCR4-NOT and the mRNA degradation complexes alters *gst-4* promoter expression. A,**

Measurement of the promoter activity of the SKN-1 target gene *gst-4* in 1-day-old animals upon the indicated RNAi treatments and **B**, Respective quantification is shown (n=3 independent experiments with at least 223 animals/experiment; \*\*P<0,01, \*\*\*P< 0.001; one-way analysis of variance (ANOVA)).

Data information: Scale bars, 20µm. Images were acquired using a X4 objective lens. Error bars denote SEM.

**A**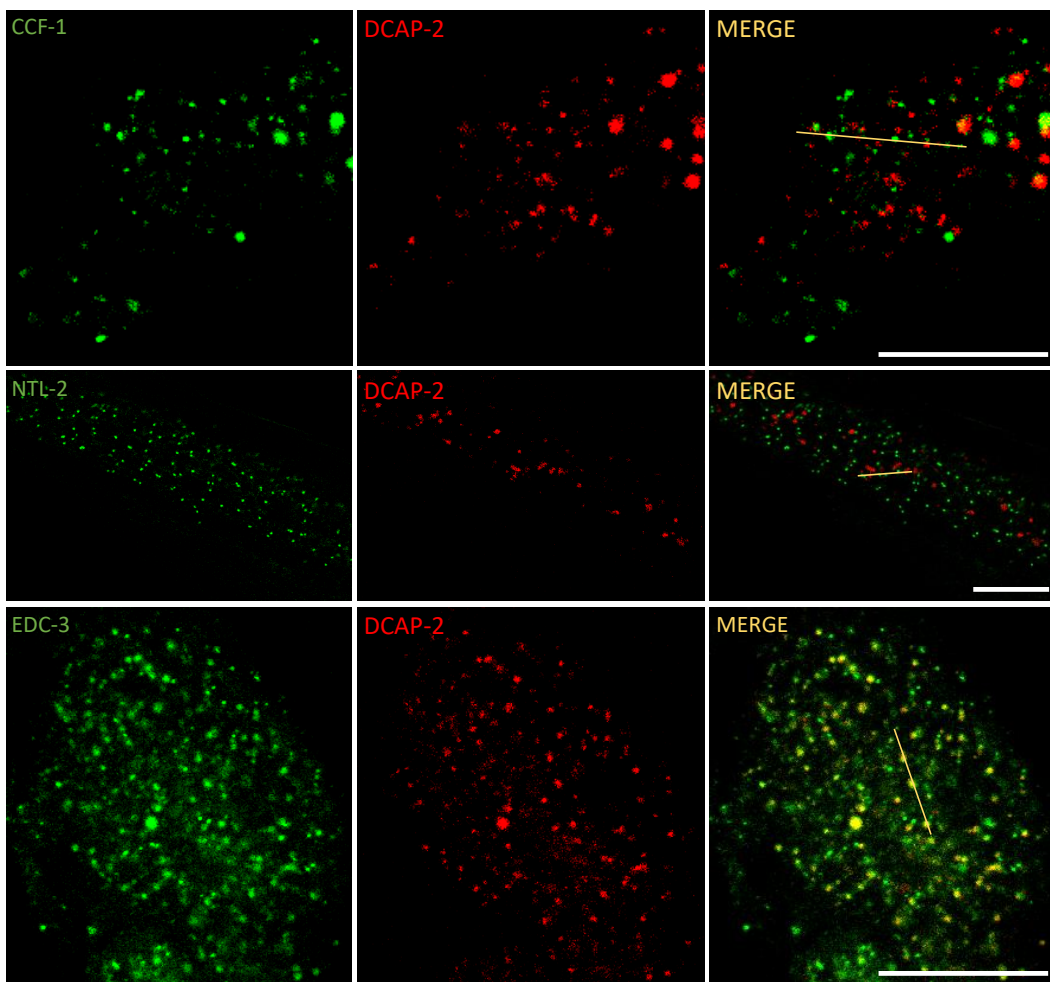**B**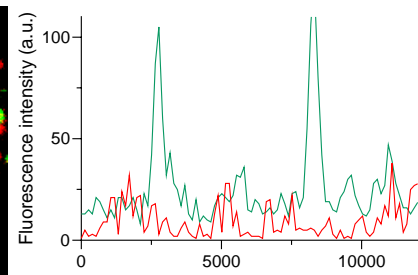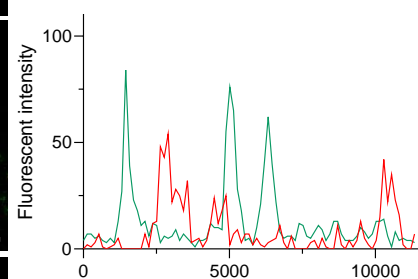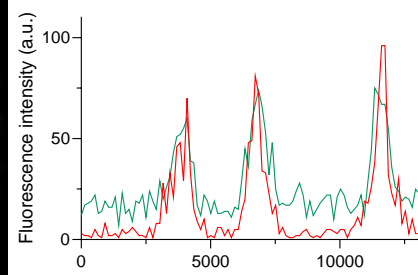**C**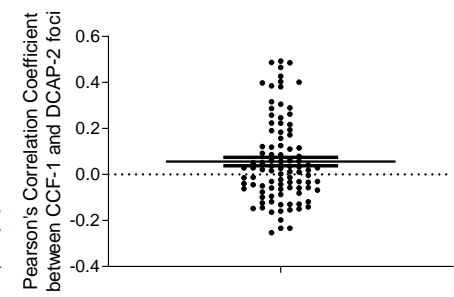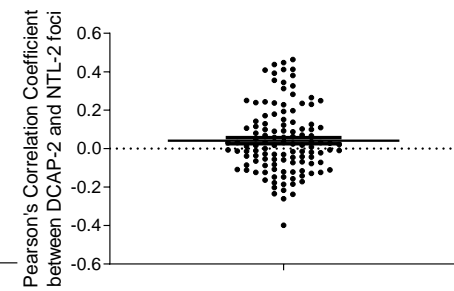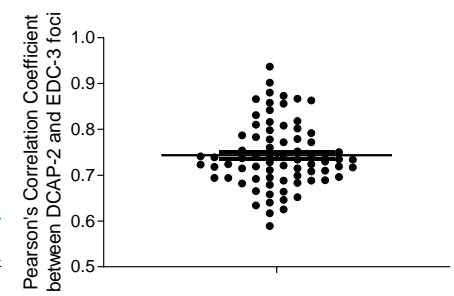

**Appendix Figure S14 - Components of the CCR4-NOT and the mRNA degradation complexes localize in distinct foci. A, (top)**

Representative images showing the localization of CCF-1- (green) and DCAP-2- (red) foci in transgenic animals that co-express them, (middle)

representative images showing the localization of NTL-2- (green) and DCAP-2- (red) labeled foci in transgenic animals that co-express them and

(bottom) representative images showing the localization of EDC-3- (green) and DCAP-2- (red) labeled foci in transgenic animals that co-express

them. **B**, Respective fluorescent intensity graphs of the foci marked with the yellow line in panel A. **C**, (top) Pearson's correlation coefficient

values after measuring the correlation between CCF-1- and DCAP-2-foci, (middle) Pearson's correlation coefficient values after measuring the

correlation between DCAP-2- and NTL-2-foci and (bottom) Pearson's correlation coefficient values after measuring the correlation between

DCAP-2- and EDC-3-foci. (n=2 independent experiments with at least 15 animals for each strain/experiment).

Data information: Scale bar, 20 $\mu$ m. Images were acquired using the X63 lens. Error bars denote SEM.

**A**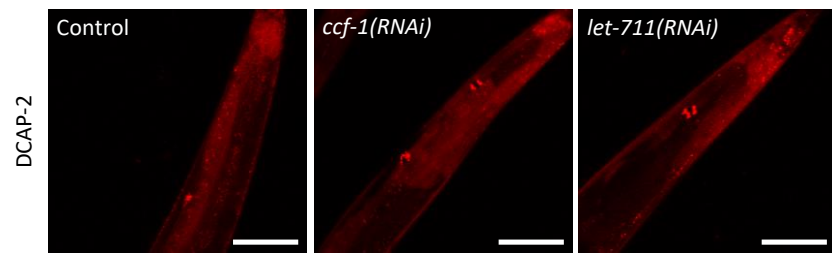**B**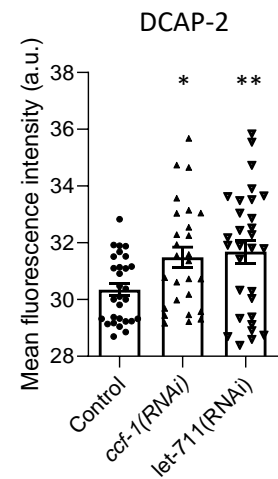**C**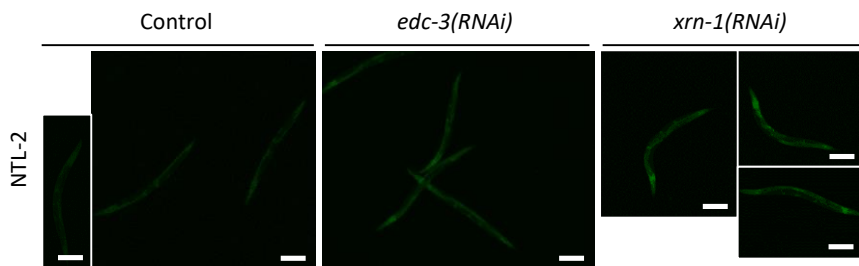**D**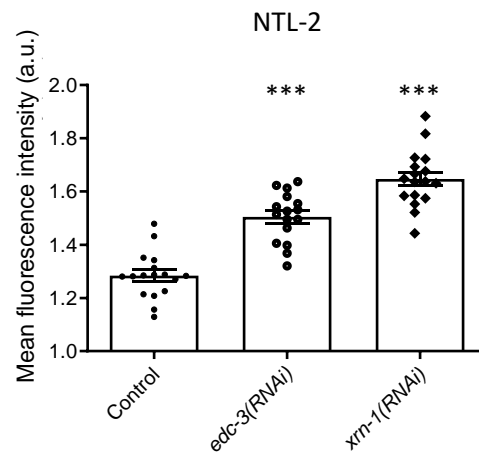

**Appendix Figure S15 - Genetic inhibition of the one type of body triggers an elevation in the protein abundance of components of the other type. A,** Representative images showing DCAP-2 expression in the posterior half of young adult animals upon genetic inhibition of storage body components. Scale bar, 100 $\mu$ m. Images were acquired using the X40 lens. **B,** Quantification of DCAP-2 levels in whole animals (n=3 independent experiments with at least 86 animals/experiment; \*P< 0.05, \*\*P< 0.01, one-way analysis of variance (ANOVA)). **C,** Representative images showing NTL-2 levels in young adult animals upon genetic inhibition of degradation body components and **D,** Respective quantification is shown (n=3 independent experiments with at least 50 animals/experiment; \*\*\*P< 0.001; one-way analysis of variance (ANOVA)).

Data information: Scale bar, 40 $\mu$ m. Images were acquired using the X4 lens. Error bars denote SEM.

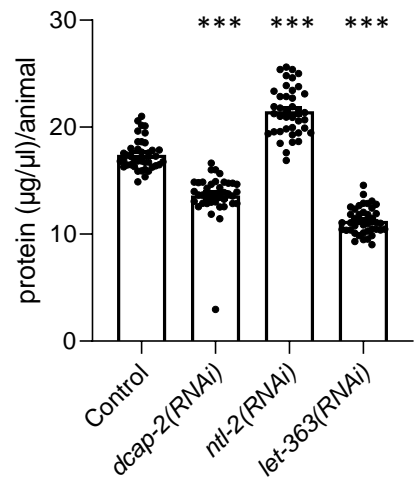



**Appendix Figure S16 - Quantification of total protein content in 1-day-old whole worm lysates under control conditions and upon inhibition of the indicated genes.** (n=3 independent experiments with at least 400 animals/experiment; \*\*\*P<0.001; one-way analysis of variance (ANOVA)).

Data information: Error bars denote SEM.

**A**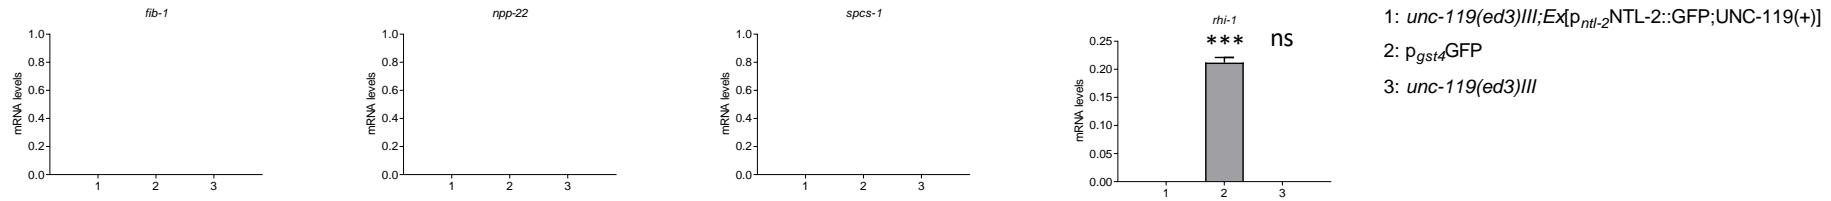**B**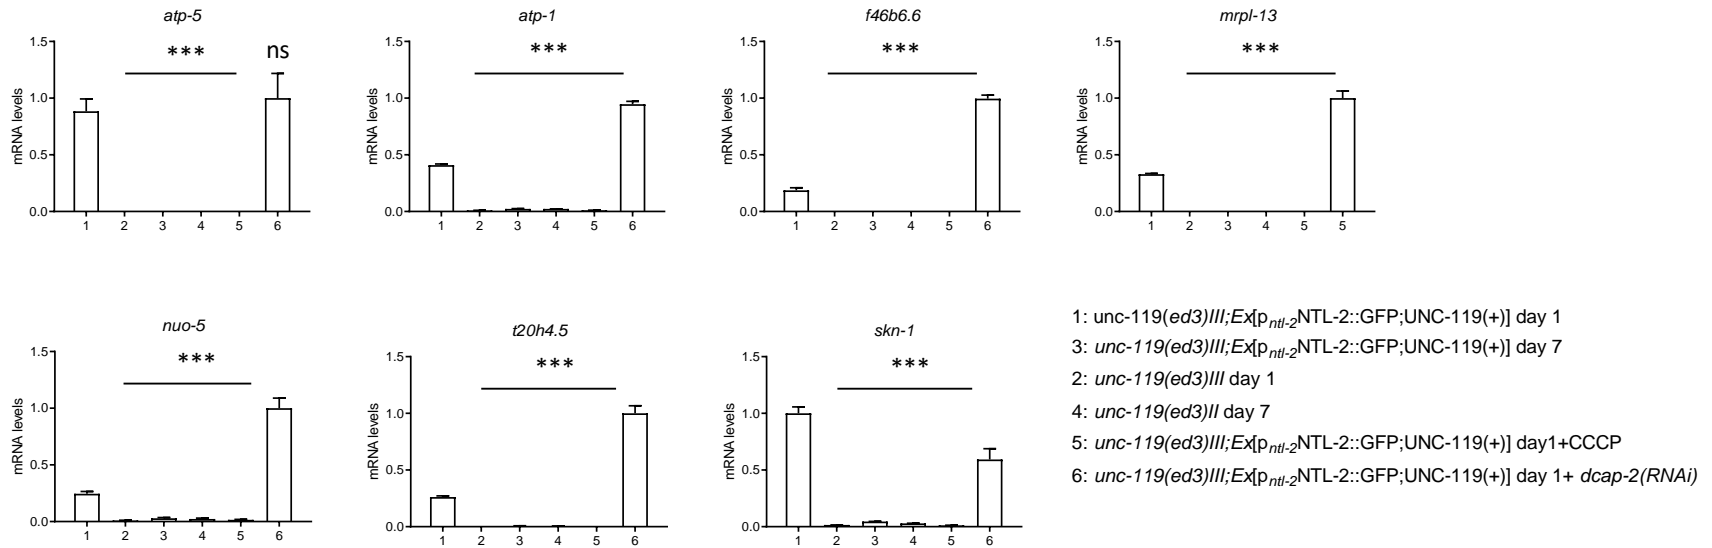

**Appendix Figure S17 - NTL-2 preferentially binds MTPTs and their association is affected by age, mitochondrial stress and genetic inhibition of *dcap-2*.** **A**, Analysis of expression of mRNAs encoding nuclear (FIB-1, NPP-22), ER (SPCS-1) and cytoplasmic (RHI-1) proteins by real time quantitative RT-PCR following RNA immunoprecipitation (RIP) in anti-GFP isolates from NTL-2::GFP transgenic animals, *unc-119(ed3)III* and *p<sub>gst-4</sub>*GFP counterparts (used as negative controls) (n=2 independent experiments; \*\*\*P< 0.001; one-way analysis of variance (ANOVA)). **B**, Analysis of expression of select MTPTs by real time quantitative RT-PCR following RNA immunoprecipitation (RIP) in anti-GFP isolates from NTL-2::GFP transgenic and *unc-119(ed3)III* animals during ageing, upon CCCP treatment and genetic inhibition of *dcap-2* (n=2 independent experiments; \*\*\*P< 0.001; one-way analysis of variance (ANOVA)).

Data information: Error bars denote SEM. Numbers at the x axis represent sample names described after the last bar plot in the right part of each figure panel.

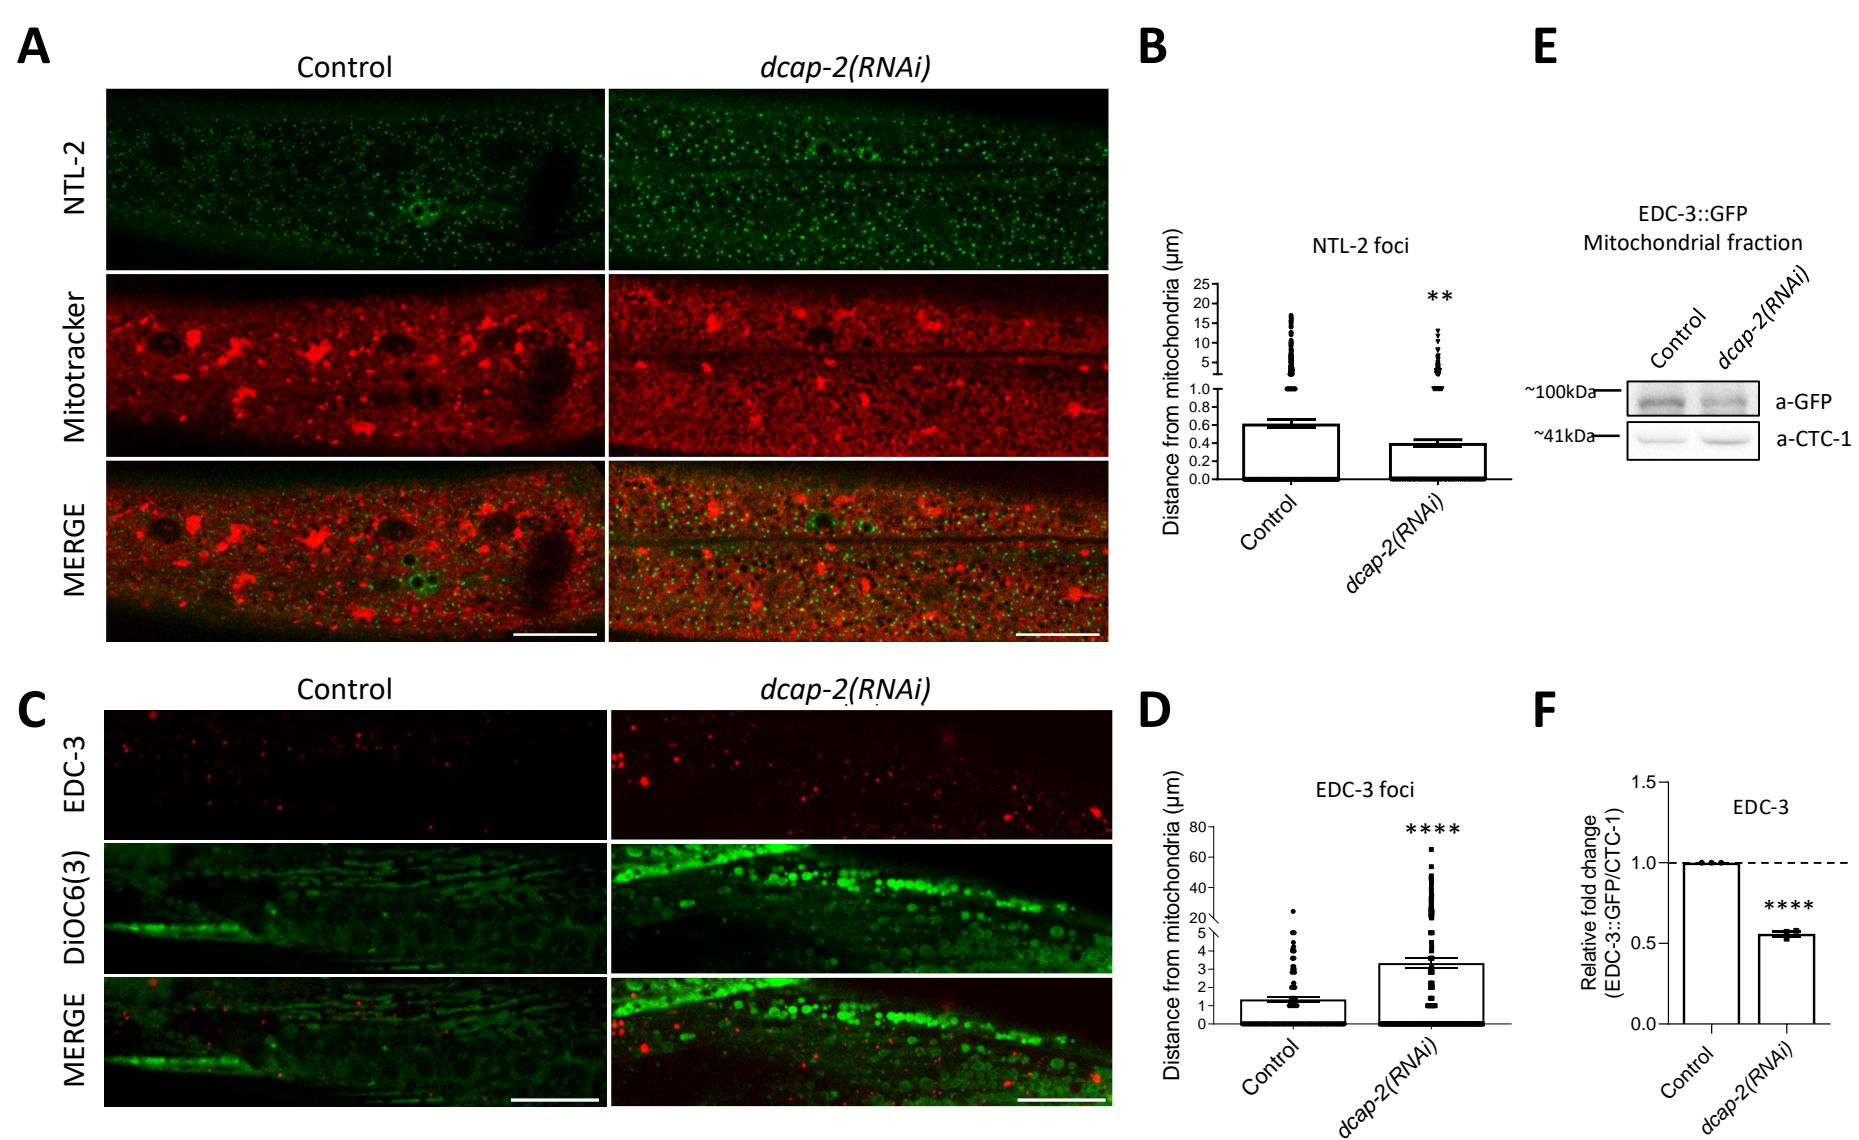

**Appendix Figure S18 - Association of storage and degradation bodies with mitochondria is oppositely affected by genetic inhibition of *dcap-2*.** **A**, Representative images showing the localization of NTL-2/storage bodies relative to mitochondria upon genetic inhibition of *dcap-2* (green: NTL-2, red: Mitotracker Deep Red FM, a mitochondrial specific dye). **B**, Quantification of the distances between NTL-2/storage bodies and mitochondria upon genetic inhibition of *dcap-2* (n=3 independent experiments with at least 30 animals/experiment; \*\*P<0.01; two-tailed unpaired *t*-test). **C**, Representative images showing the localization of EDC-3/degradation bodies relative to mitochondria upon genetic inhibition of *dcap-2* (red: EDC-3, green: DiOC6(3), a mitochondria-specific dye). **D**, Quantification of the distances between EDC-3/degradation bodies and mitochondria upon genetic inhibition of *dcap-2* (n=3 independent experiments with at least 30 animals per experiment; \*\*\*\*P<0.0001; two-tailed unpaired *t*-test). **E**, Representative image from Immunoblot analysis showing that EDC-3 is less associated with mitochondria upon genetic inhibition of *dcap-2* and **F**, Respective quantification of EDC-3 levels normalized to CTC-1 is shown (n= 3 independent experiments; \*\*\*\*P<0.0001; two-tailed unpaired *t*-test).

Data information: Scale bar, 20µm. Images were acquired using the X63 lens. Error bars denote SEM.

**A**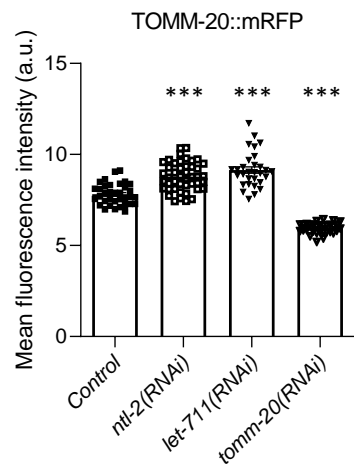**B**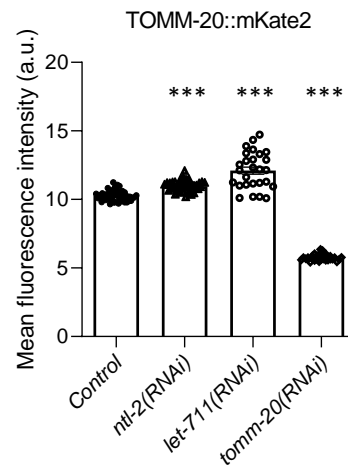

**Appendix Figure S19 - TOMM-20 levels increase upon genetic inhibition of storage body components. A**, Genetic inhibition of either *ntl-2* or *let-711* increases the expression levels of TOMM-20::mRFP expressed in body wall muscle cells. **B**, Genetic inhibition of either *ntl-2* or *let-711* increases the expression levels of TOMM-20::mKate2 ubiquitously expressed in all animal tissues. *tomm-20(RNAi)* is used as a control. (n=2 independent experiments with at least 141 animals/experiment (for A) and 147 animals/experiment (for B); \*\*\*P< 0.001; one-way analysis of variance (ANOVA)).

Data information: Error bars denote SEM.

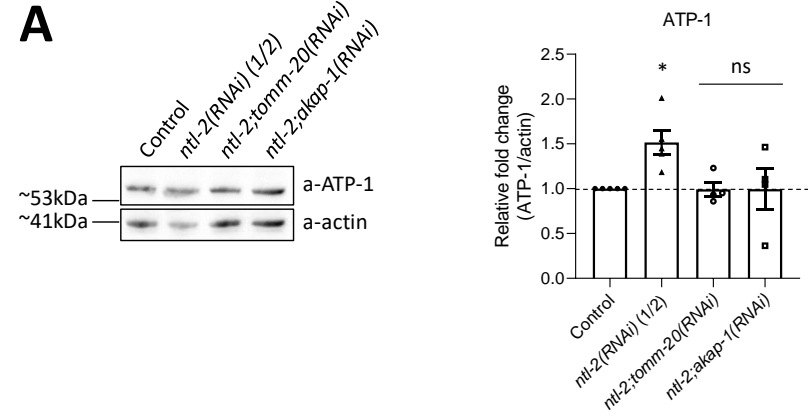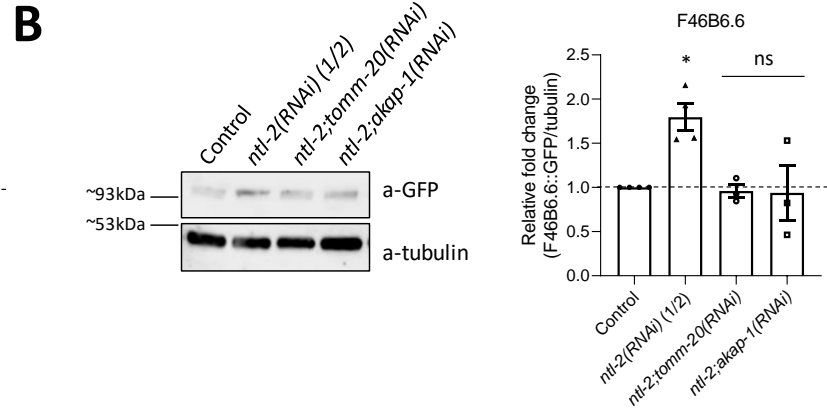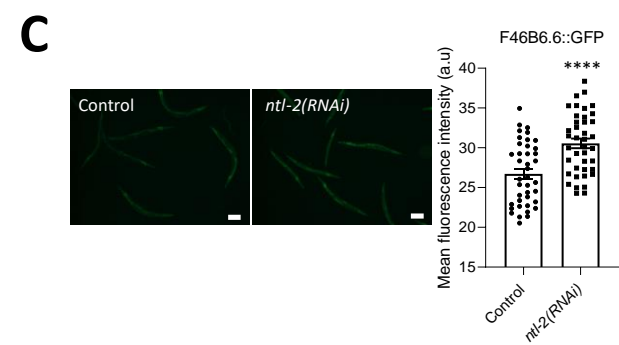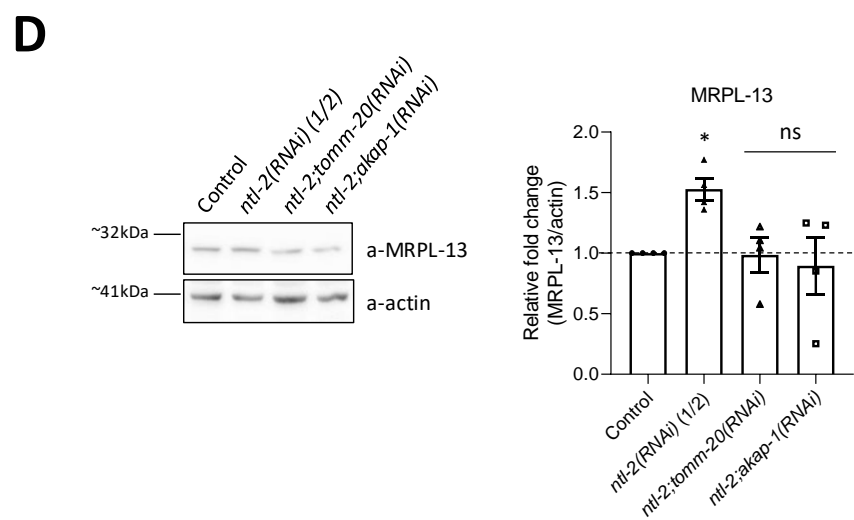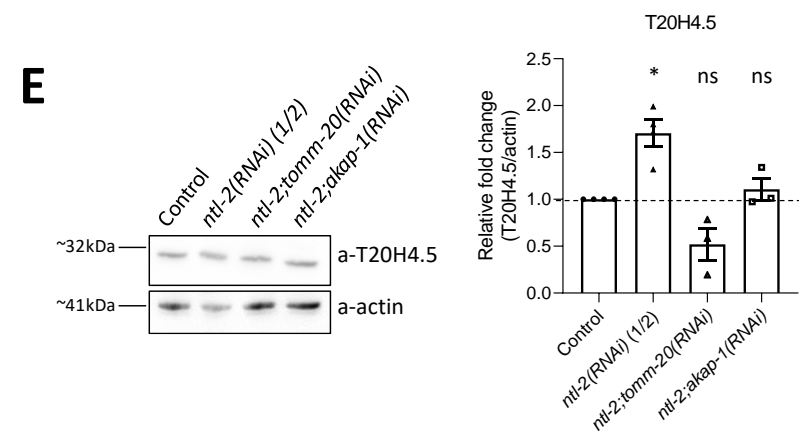



**Appendix Figure S20 - Knockdown of *ntl-2* increases MTPT protein levels in a TOMM-20- and AKAP-1-dependent manner. A,** (left)

Immunoblot analysis in 1-day-old whole animal extracts showing the protein levels of ATP-1 in control conditions and upon the indicated genetic inhibitions and (right) respective quantification (n= at least 3 independent experiments; \*P<0.05; one-way analysis of variance (ANOVA) followed by Dunnett's T3 multiple comparisons test).

**B,** (left) Immunoblot analysis in 1-day-old whole animal extracts showing the protein levels of F46B6.6 in control conditions and upon the indicated genetic inhibitions and (right) respective quantification (n= at least 3 independent

experiments; \*P<0.05; one-way analysis of variance (ANOVA) followed by Dunnett's T3 multiple comparisons test). **C,** (left) Representative images showing F46B6.6 protein levels in 1-day-old animals fed bacteria expressing control or *ntl-2* RNAi. Scale bars, 40µm; and respective quantification is shown in right (n=2 independent experiments with at least 40 animals/experiment; \*\*\*\*P< 0.05; two-tailed unpaired *t*-test).

**D,** (left) Immunoblot analysis in 1-day-old whole animal extracts showing the protein levels of MRPL-13 in control conditions and upon the indicated genetic inhibitions and respective quantification is shown in right (n= 4 independent experiments; \*P<0.05; Welch's one-way analysis of variance (ANOVA) followed by Dunnett's T3 multiple comparisons test).

**E,** (left) Immunoblot analysis in 1-day-old whole animal extracts showing the protein levels of T20H4.5 in control conditions and upon the indicated genetic inhibitions (n= at least 3 independent experiments; \*P<0.05; Welch's one-way analysis of variance (ANOVA) followed by Dunnett's T3 multiple comparisons test).

Data information: Error bars denote SEM.

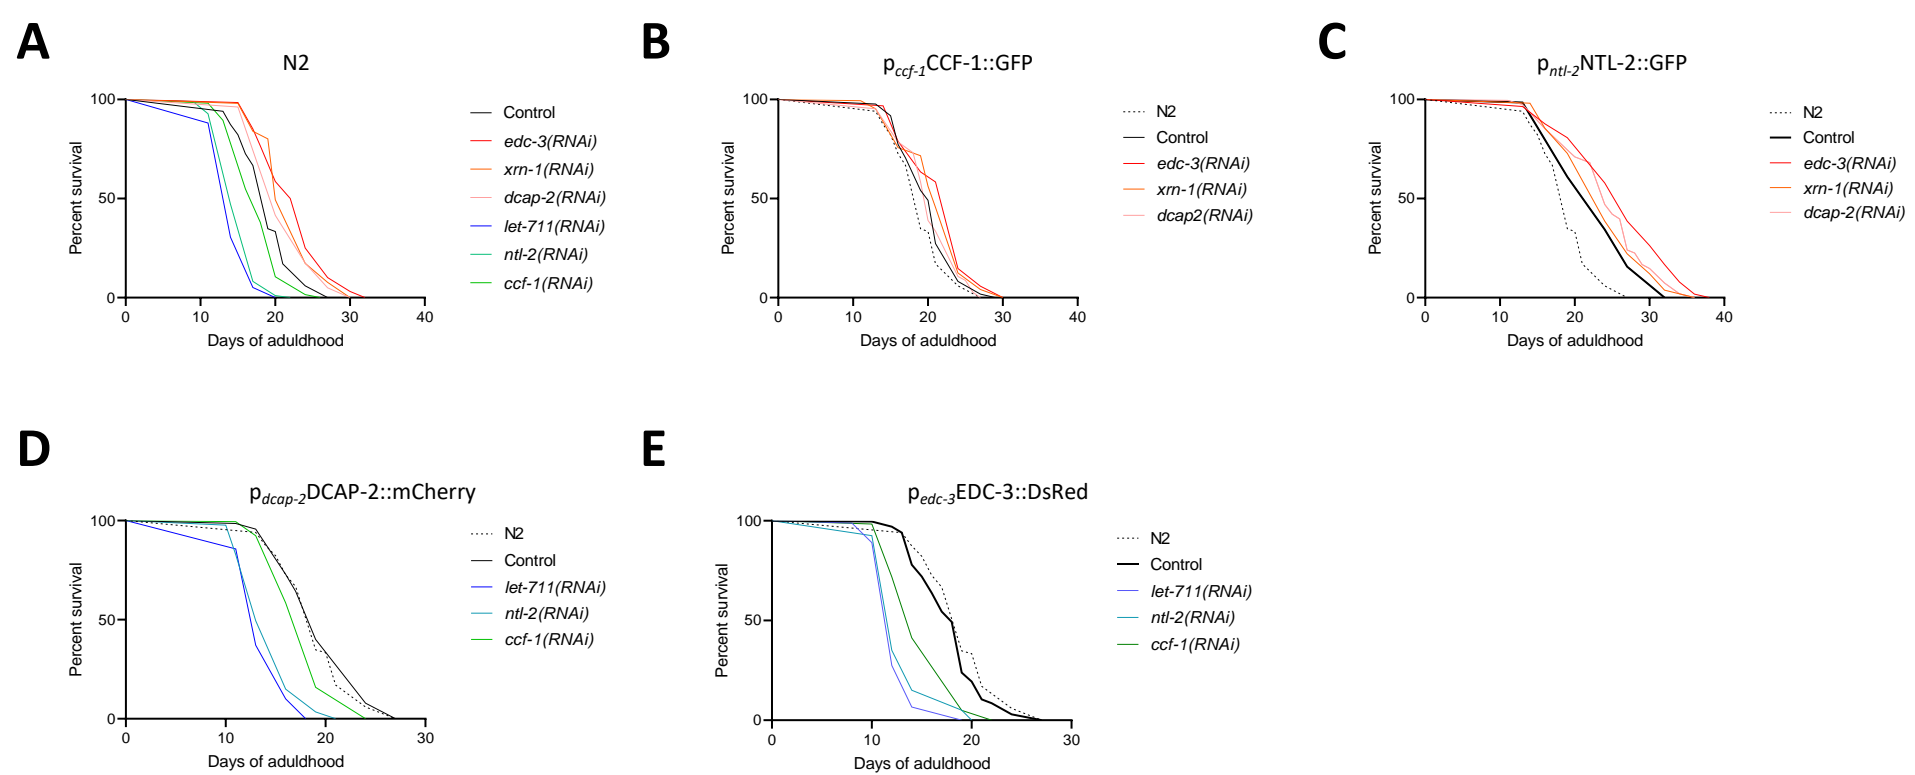

**Appendix Figure S21 - Balance of storage and degradation body components regulates lifespan. A**, Knockdown of storage and degradation body components oppositely affect longevity. **B**, Knockdown of degradation body components further extends the lifespan of CCF-1 overexpressing animals. **C**, Knockdown of degradation body components extends the lifespan of NTL-2 overexpressing animals. **D**, Knockdown of storage body components shortens the lifespan of transgenic animals overexpressing DCAP-2. **E**, Knockdown of storage body components shortens the lifespan of transgenic animals overexpressing EDC-3.

Data information: Lifespan assays were performed at 20°C; detailed lifespan data are given in Table EV4.

**A**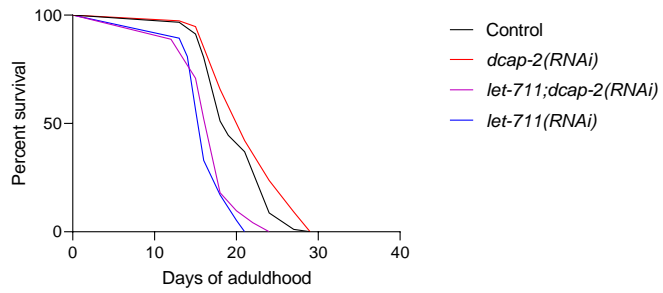**B**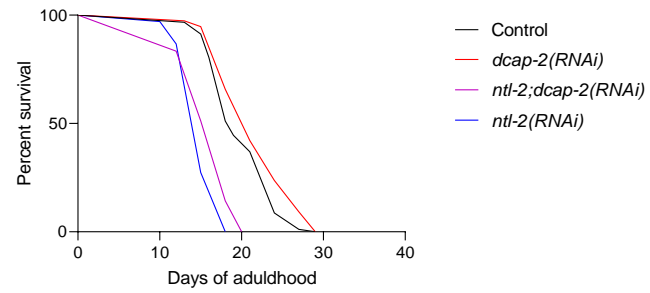**C**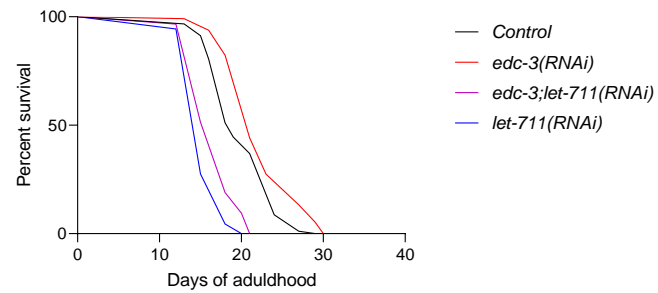**D**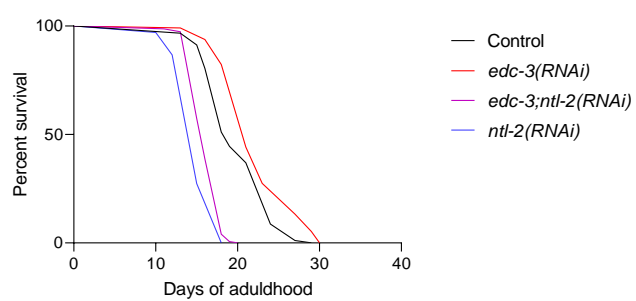**E**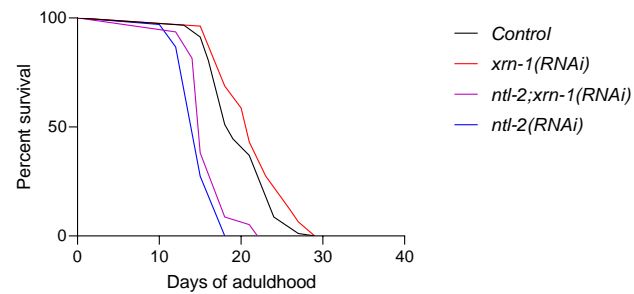

**Appendix Figure S22 - Effects of concomitant knockdown of storage and degradation body components on longevity.** **A**, Concomitant knockdown of *let-711* and *dcap-2* reverses *dcap-2* longevity. **B**, Concomitant knockdown of *ntl-2* and *dcap-2* reverses *dcap-2* longevity. **C**, Concomitant knockdown of *edc-3* and *let-711* reverses *edc-3* longevity. **D**, Concomitant knockdown of *edc-3* and *ntl-2* reverses *edc-3* longevity. **E**, Concomitant knockdown of *ntl-2* and *xrn-1* reverses *xrn-1* longevity.

Data information: Lifespan assays were performed at 20°C; detailed lifespan data are given in Table EV4.

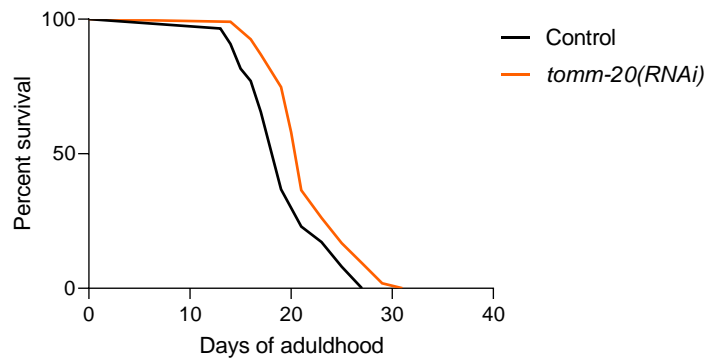

**Appendix Figure S23 - *tomm-20* knockdown extends lifespan.**

Data information: Lifespan assays were performed at 20°C; detailed lifespan data are given in Table EV4.
