# Supplementary material for: Local coordination of mRNA storage and degradation near mitochondria modulates C. elegans ageing
Source: PubMed Central journal article supplement — EMBO J. 2023 Jul 10;42(16):e112446. doi: 10.15252/embj.2022112446 (PMC10425844; doi:10.15252/embj.2022112446), 2023-07-10
Supplement: EMBJ-42-e112446-s008.pdf [file EMBJ-42-e112446-s008.pdf]

# Expanded View Figures

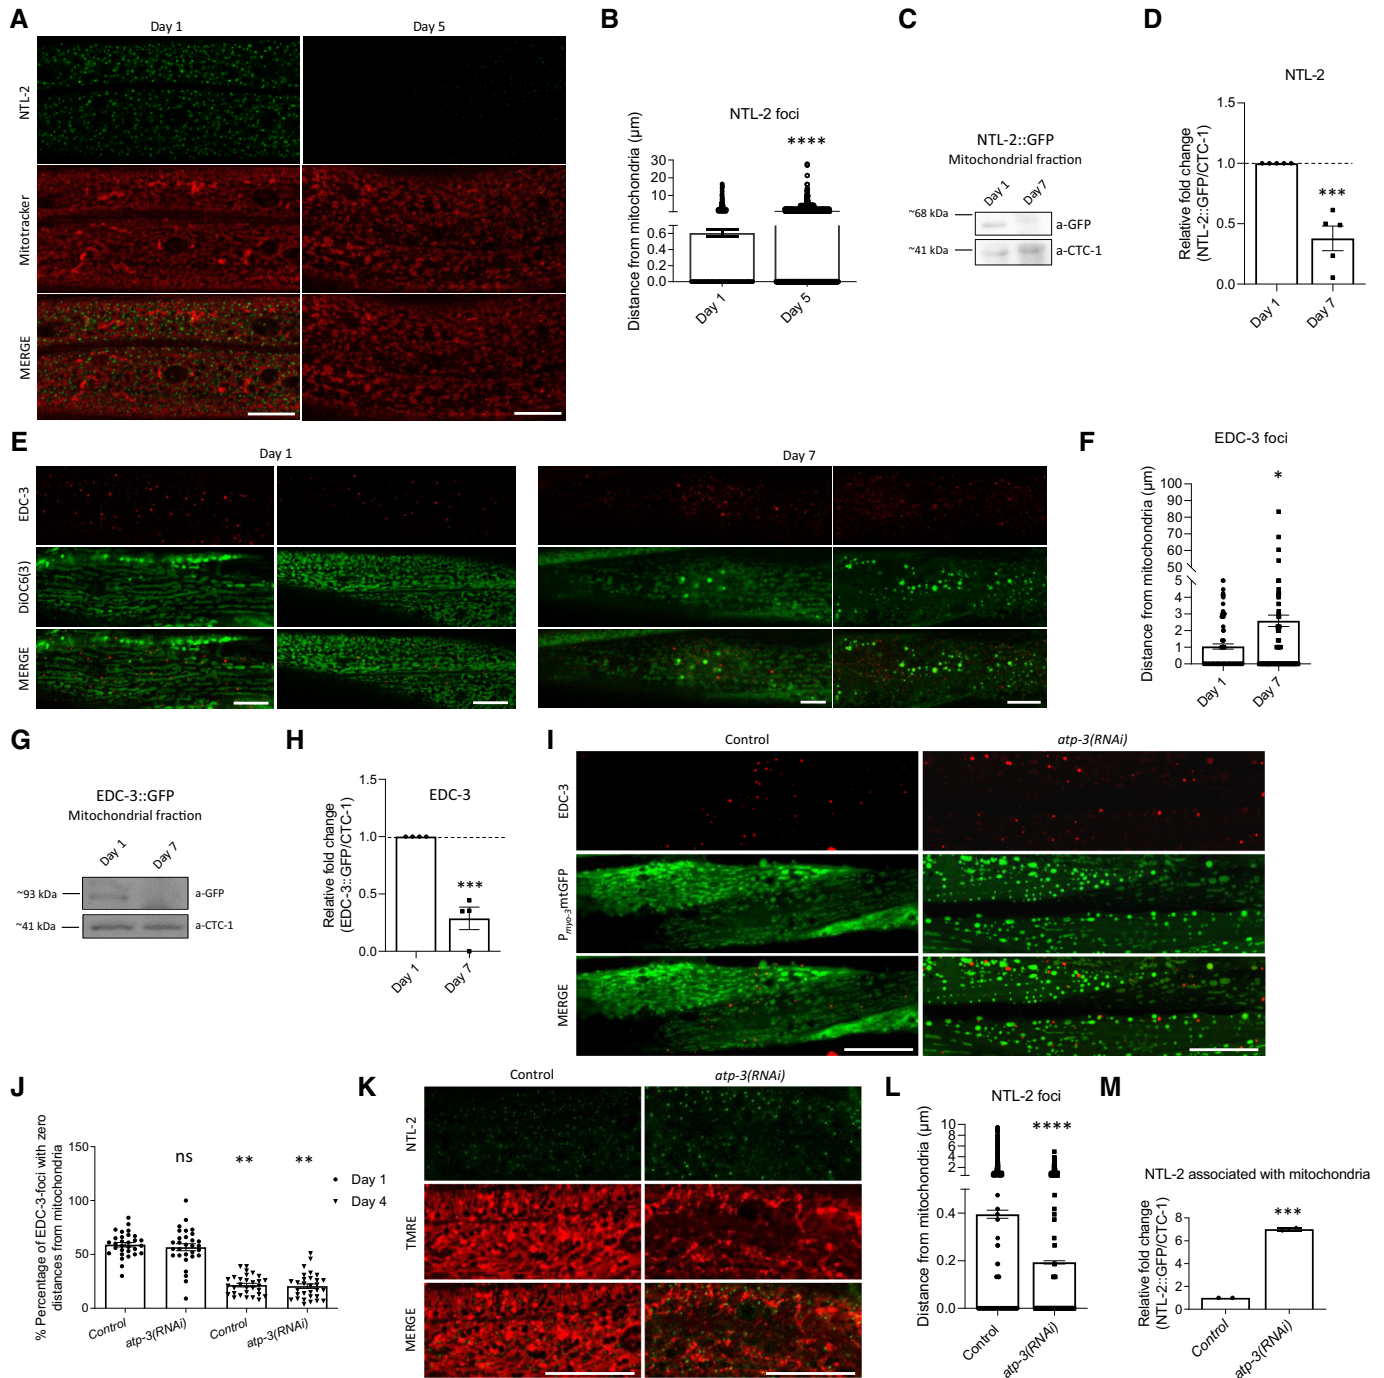

Figure EV1.

**Figure EV1. The association of CCR4-NOT and mRNA degradation complex components with mitochondria is age-dependent.**

- A Representative images showing the localization of NTL-2 foci relative to mitochondria in young versus old animals (green: NTL-2, red: Mitotracker Deep Red FM, a mitochondrial-specific dye;  $n = 2$  independent experiments).
- B Quantification of the distances, the NTL-2 foci obtain from mitochondria in young versus older animals ( $n = 3$  independent experiments with at least 40 animals/experiment; \*\*\*\* $P < 0.0001$ ; two-tailed unpaired  $t$ -test).
- C Representative image from immunoblot analysis showing that NTL-2–mitochondria association decreases during ageing.
- D Respective quantification ( $n = 5$  independent experiments, \*\*\* $P < 0.001$ ; two-tailed unpaired  $t$ -test).
- E Representative images showing the localization of EDC-3 foci relative to mitochondria in young (left) versus old animals (right) (red: EDC-3, green: DiOC6(3)) ((3,3'-dihexyloxycarbocyanine iodide), a mitochondrial-specific dye;  $n = 2$  independent experiments; image of day 1 adults in left is reused in Fig EV2K as conditions shown in (E) and Fig EV2K are part of the same experimental setup).
- F Quantification of the distances EDC-3 foci obtain from mitochondria in young versus older animals ( $n = 2$  independent experiments with at least 40 animals/experiment; \* $P < 0.05$ ; two-tailed unpaired  $t$ -test).
- G Representative image from immunoblot analysis showing that EDC-3 is less associated with mitochondria in older animals compared to younger ones.
- H Respective quantification ( $n = 4$  independent experiments; \*\*\* $P < 0.001$ ; two-tailed unpaired  $t$ -test).
- I Representative images showing the localization of EDC-3 foci relative to mitochondria in young adult animals upon genetic inhibition of *atp-3* (red: EDC-3, green: mitochondrial matrix targeted by GFP;  $n = 2$  independent experiments).
- J Quantification of the percentage of EDC-3 foci with zero distance from mitochondria under control conditions and following genetic inhibition of *atp-3* at days 1 and 4 of adulthood ( $n = 2$  independent experiments with at least 40 animals/experiment; \*\* $P < 0.01$ ; one-way analysis of variance (ANOVA)).
- K Representative images showing the localization of NTL-2 foci relative to mitochondria in control conditions and upon genetic inhibition of *atp-3* (green: NTL-2, red: TMRE, a mitochondrial membrane potential-dependent dye;  $n = 2$  independent experiments).
- L Quantification of the distances of NTL-2 foci from mitochondria in control conditions and upon genetic inhibition of *atp-3* ( $n = 2$  independent experiments with at least 30 animals/experiment; \*\* $P < 0.01$ ; two-tailed unpaired  $t$ -test).
- M Quantification of the NTL-2 protein bound to mitochondria under control conditions and upon genetic inhibition of *atp-3* (immunoblot analysis is shown in Fig 5E,  $n = 2$  independent experiments; \*\* $P < 0.01$ ; unpaired two-tailed  $t$ -test).

Data information: Images were acquired using an  $\times 63$  objective lens. Scale bars, 20  $\mu\text{m}$ . Error bars denote SEM.

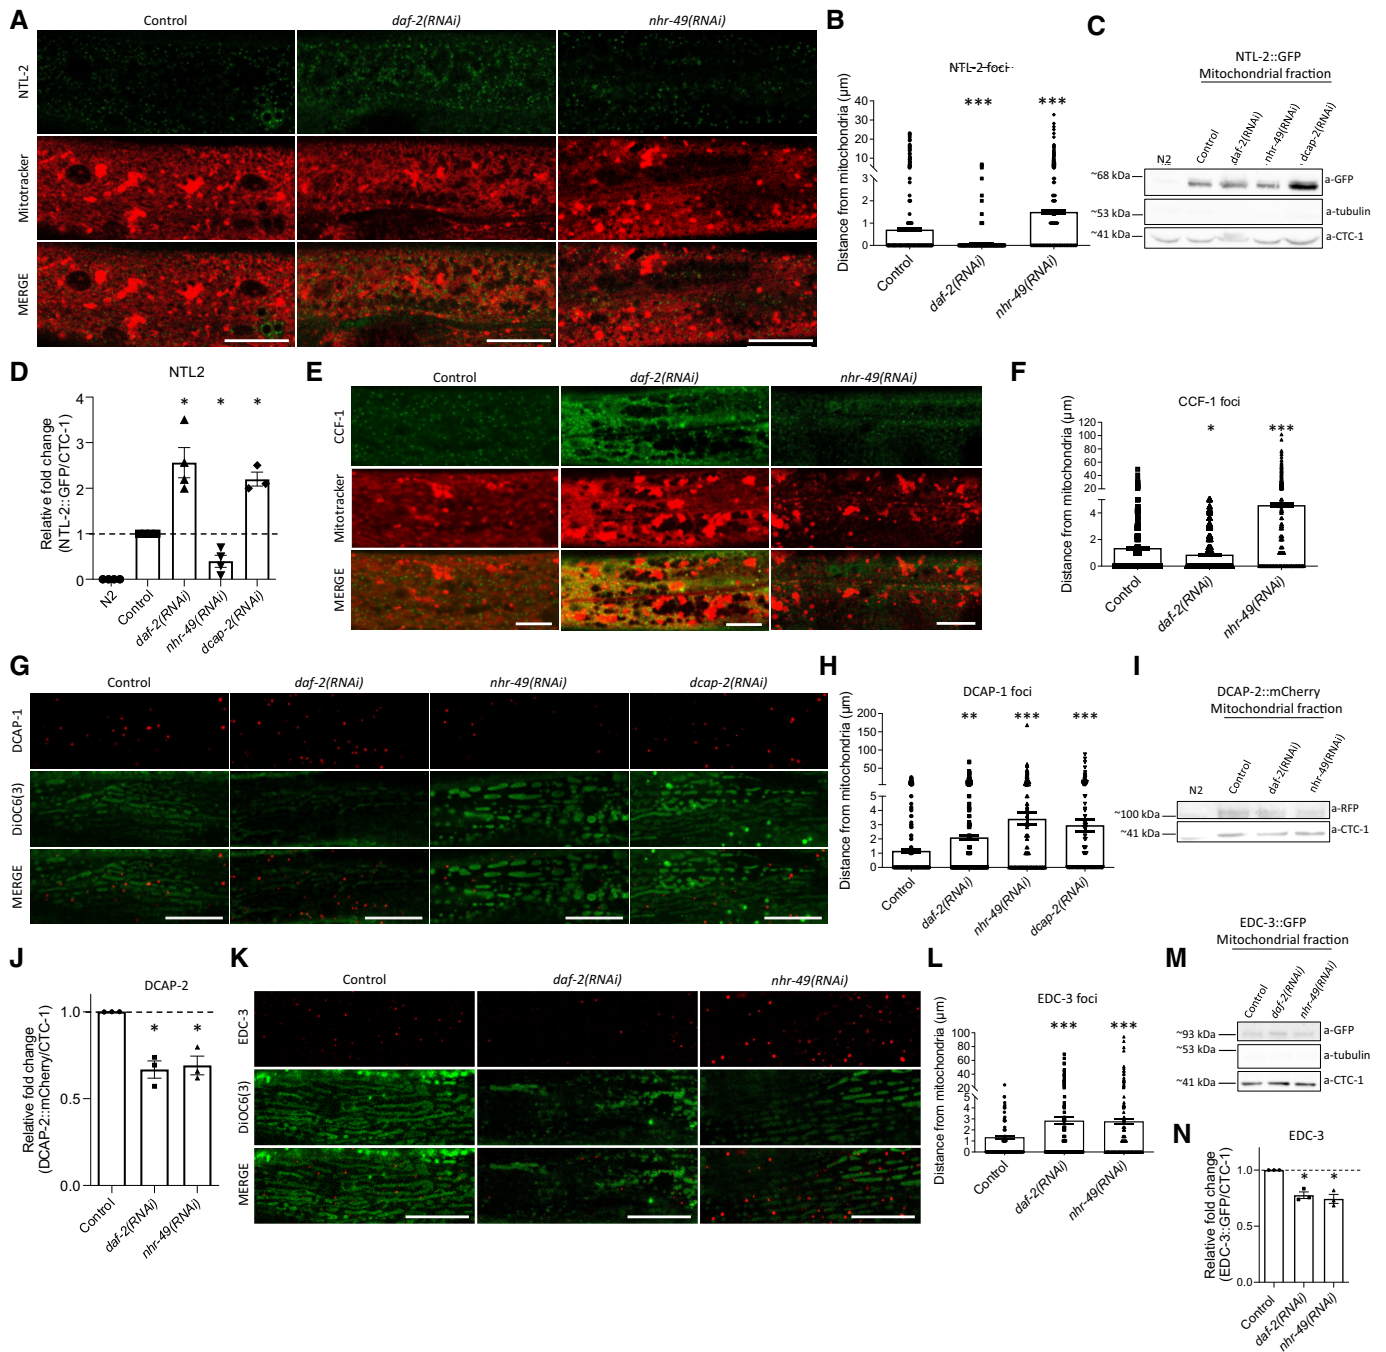

Figure EV2.

**Figure EV2. Association of the CCR4-NOT and the mRNA degradation complex components with mitochondria is tightly and differentially regulated in long- and short-lived animals.**

- A Representative images showing the localization of NTL-2 foci relative to mitochondria upon genetic inhibition of either *daf-2* known to extend lifespan or *nhr-49* known to shorten lifespan (green: NTL-2, red: Mitotracker Deep Red FM, a mitochondria-specific dye).
- B Quantification of the distances NTL-2 foci obtain from mitochondria upon genetic inhibition of *daf-2* or *nhr-49* ( $n = 3$  independent experiments with at least 45 animals/experiment;  $***P < 0.001$ ; one-way analysis of variance (ANOVA)).
- C Immunoblot analysis in isolated mitochondria of 1-day-old animals showing the protein levels of NTL-2 present in the mitochondrial isolate derived from animals under control conditions and upon the indicated genetic inhibitions.
- D Quantification of western blot presented in B ( $n =$  at least 3 independent experiments;  $*P < 0.05$ ; Welch's one-way analysis of variance (ANOVA) followed by Dunnett's T3 multiple-comparisons test).
- E Representative images showing the localization of CCF-1 foci relative to mitochondria upon genetic inhibition of *daf-2* or *nhr-49* in day 1 adults; image in control is reused in Appendix Fig S3A as conditions shown in Appendix Fig S3A and (E) are part of the same experimental setup (green: CCF-1, red: Mitotracker Deep Red FM, a mitochondrial-specific dye).
- F Quantification of the distances CCF-1 foci obtain from mitochondria upon genetic inhibition of *daf-2* or *nhr-49* ( $n = 3$  independent experiments with at least 45 animals/experiment;  $*P < 0.05$ ,  $***P < 0.001$ ; one-way analysis of variance (ANOVA)).
- G Representative images showing the localization of DCAP-1 foci relative to mitochondria upon genetic inhibition of *daf-2*, *nhr-49* or *dcap-2* (red: DCAP-1, green: DiOC6(3), a mitochondria-specific dye).
- H Quantification of the distances DCAP-1 foci obtain from mitochondria upon genetic inhibition of *daf-2*, *nhr-49* or *dcap-2* ( $n = 3$  independent experiments with at least 45 animals/experiment;  $**P < 0.01$ ,  $***P < 0.001$ ; one-way analysis of variance (ANOVA)).
- I Immunoblot analysis in isolated mitochondria of 1-day-old animals showing the protein levels of DCAP-2 present in the mitochondrial isolate in control conditions and upon the indicated genetic inhibitions.
- J Respective quantifications ( $n =$  at least 3 independent experiments;  $*P < 0.05$ ; Welch's one-way analysis of variance (ANOVA) followed by Dunnett's T3 multiple-comparisons test).
- K Representative images showing the localization of EDC-3 foci relative to mitochondria upon genetic inhibition of *daf-2* or *nhr-49* in day 1 adults (red: EDC-3, green: DiOC6(3), a mitochondria-specific dye; image in control is reused in Fig EV1E as conditions shown in Figs EV1E and (K) are part of the same experimental setup).
- L Quantification of the distances EDC-3 foci (shown in dots) obtain from mitochondria upon genetic inhibition of *daf-2* or *nhr-49* ( $n = 3$  independent experiments with at least 45 animals/experiment;  $***P < 0.001$ ; one-way analysis of variance (ANOVA)).
- M Immunoblot analysis in isolated mitochondria of 1-day-old animals showing the protein levels of EDC-3 present on mitochondria in control conditions and upon the indicated genetic inhibitions.
- N Respective quantification ( $n = 3$  independent experiments;  $*P < 0.05$ ; Welch's one-way analysis of variance (ANOVA) followed by Dunnett's T3 multiple-comparisons test).

Data information: Images were acquired using a  $\times 63$  objective lens. Scale bars, 20  $\mu\text{m}$ . Error bars denote SEM.

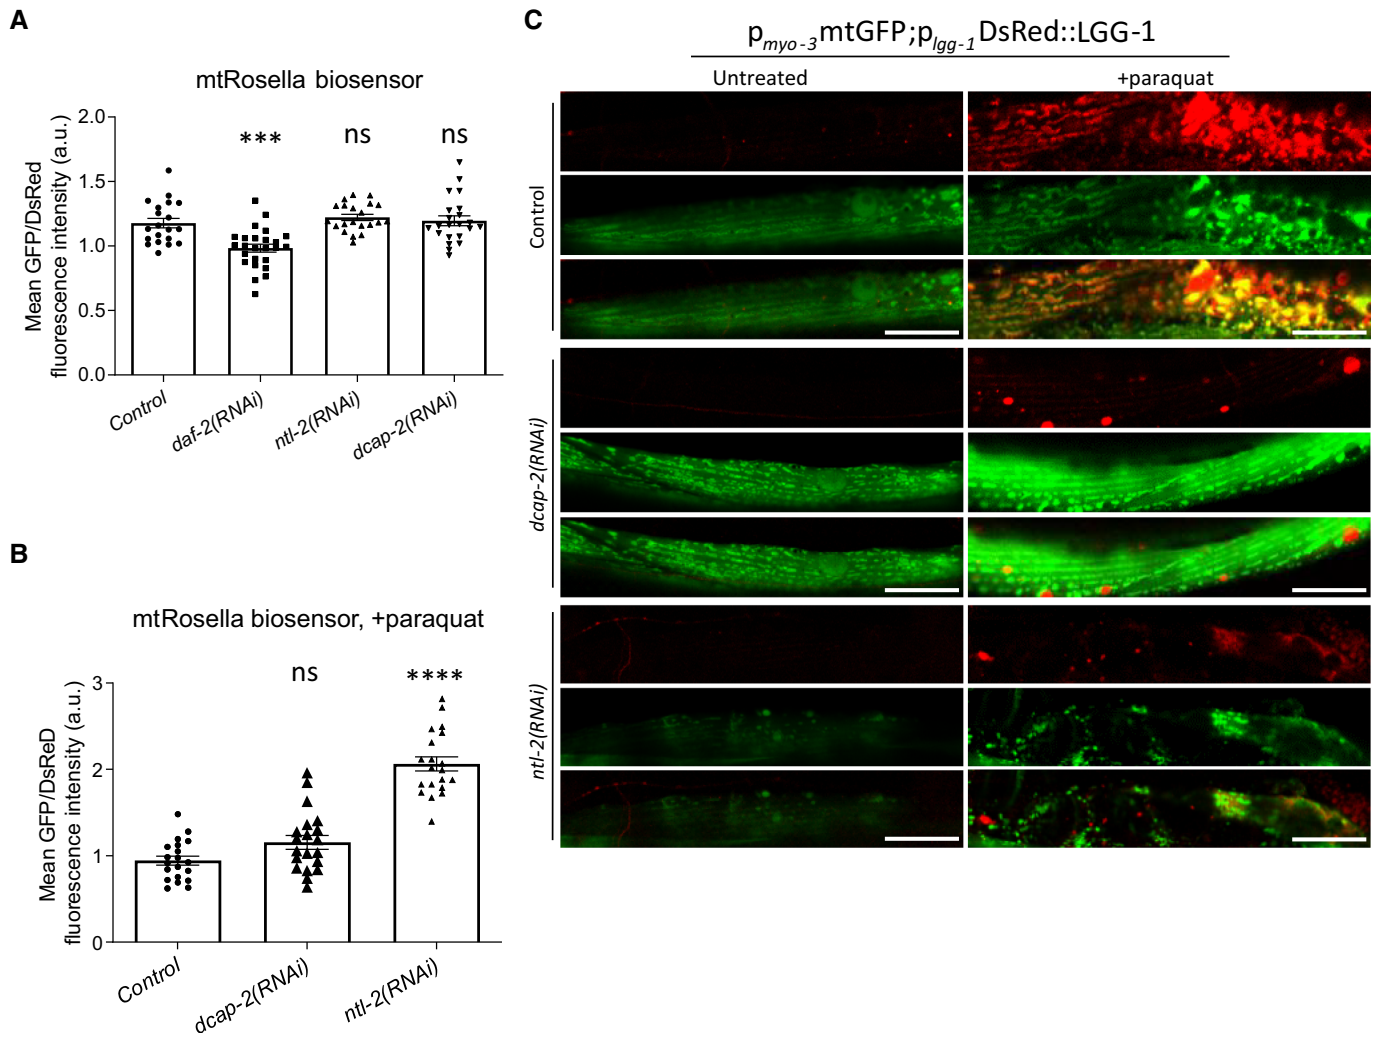

**Figure EV3. Perturbation of CCR4-NOT and mRNA degradation complex components blocks mitophagy induction.**

A, B Transgenic animals expressing the mitochondria-targeted Rosella (mtRosella) biosensor in body wall muscles were used to assess mitophagy (A) upon genetic inhibition of either *ntl-2* or *dcap-2* under control conditions; *daf-2* RNAi is used as a positive control ( $n = 3$  independent experiments with at least 88 animals/experiment;  $***P < 0.001$ ; one-way analysis of variance (ANOVA)) and (B) after paraquat treatment ( $n = 2$  independent experiments with at least 30 animals/experiment;  $****P < 0.0001$ ; one-way analysis of variance (ANOVA)). Mitophagy induction is signified by the reduction in the ratio between pH-sensitive GFP to pH-insensitive DsRed.

C Representative images showing mitophagy events under control conditions and following paraquat treatment in animals expressing a mitochondria-targeted GFP, together with the autophagosomal marker LGG-1 fused with DsRed in body wall muscle cells and subjected to either *dcap-2* or *ntl-2* RNAi (green: mitochondria, red: autophagosomes; yellow: mitophagy events;  $n = 2$  independent experiments).

Data information: Images were acquired using an  $\times 40$  objective lens. Scale bars, 20  $\mu\text{m}$ . Error bars denote SEM.

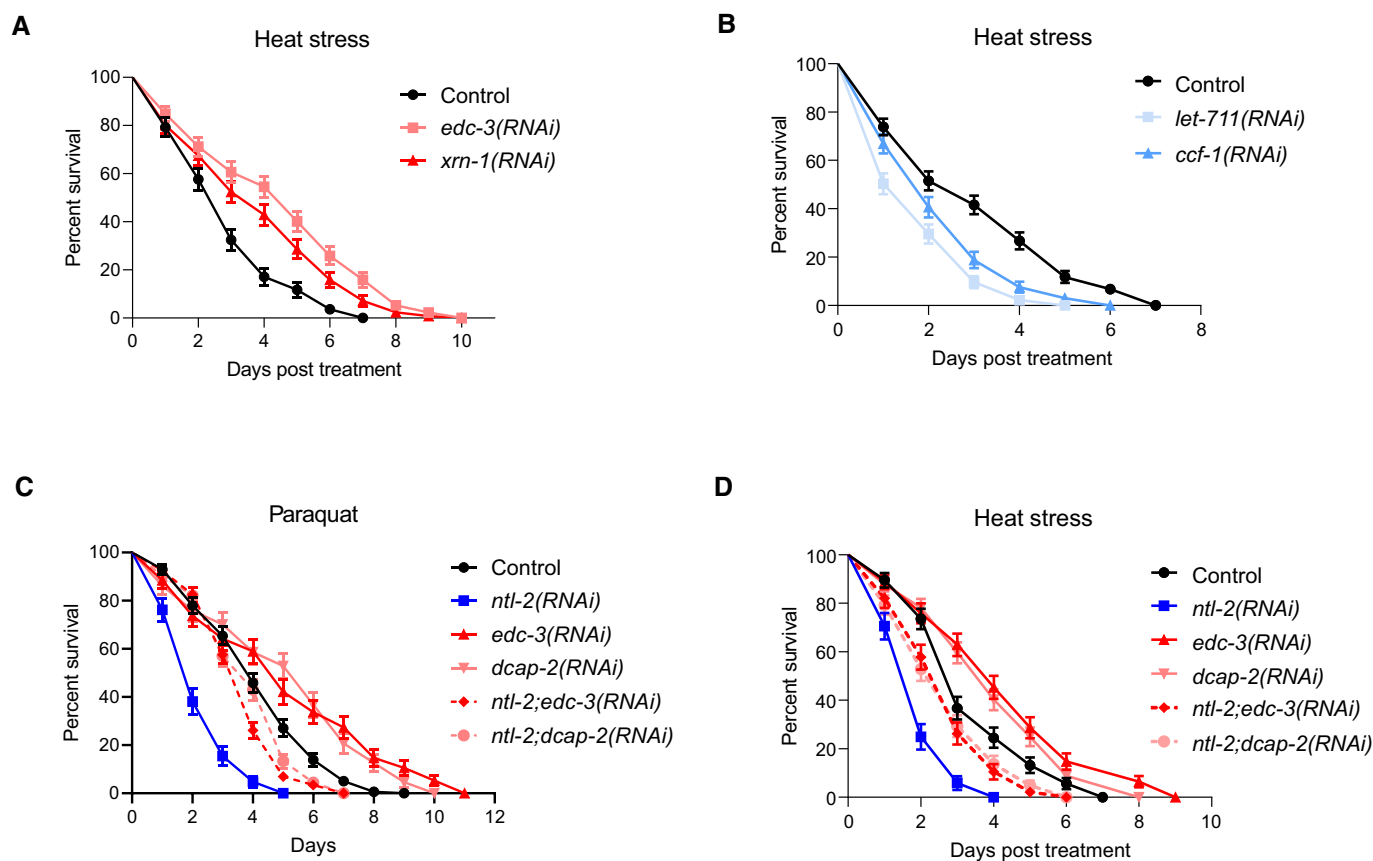

**Figure EV4. Balance between storage and degradation body components is indispensable for animal stress resistance.**

- A Per cent survival of wild-type, EDC-3- and XRN-1-depleted animals exposed to heat stress for 5 h at 37°C and then counted every 24 h ( $n = 3$  independent experiments with at least 369 animals/experiment).
- B Per cent survival of wild-type, LET-711- and CCF-1-depleted animals exposed to heat stress performed for 5 h at 37°C counted every 24 h ( $n = 3$  independent experiments with at least 429 animals/experiment).
- C Per cent survival of wild-type animals fed with bacteria expressing either control or the indicated RNAi construct diluted 1:1 following paraquat (8 mM) administration and counted every 24 h ( $n = 3$  independent experiments with at least 603 animals/experiment).
- D Per cent survival of wild-type animals fed with bacteria expressing either control or the indicated RNAi construct diluted 1:1 and subjected to heat stress for 5 h at 37°C counted every 24 h ( $n = 3$  independent experiments with at least 603 animals/experiment).

Data information: Error bars denote SEM. Stress assays were performed at 20°C; detailed data are given in Tables EV1–EV3.

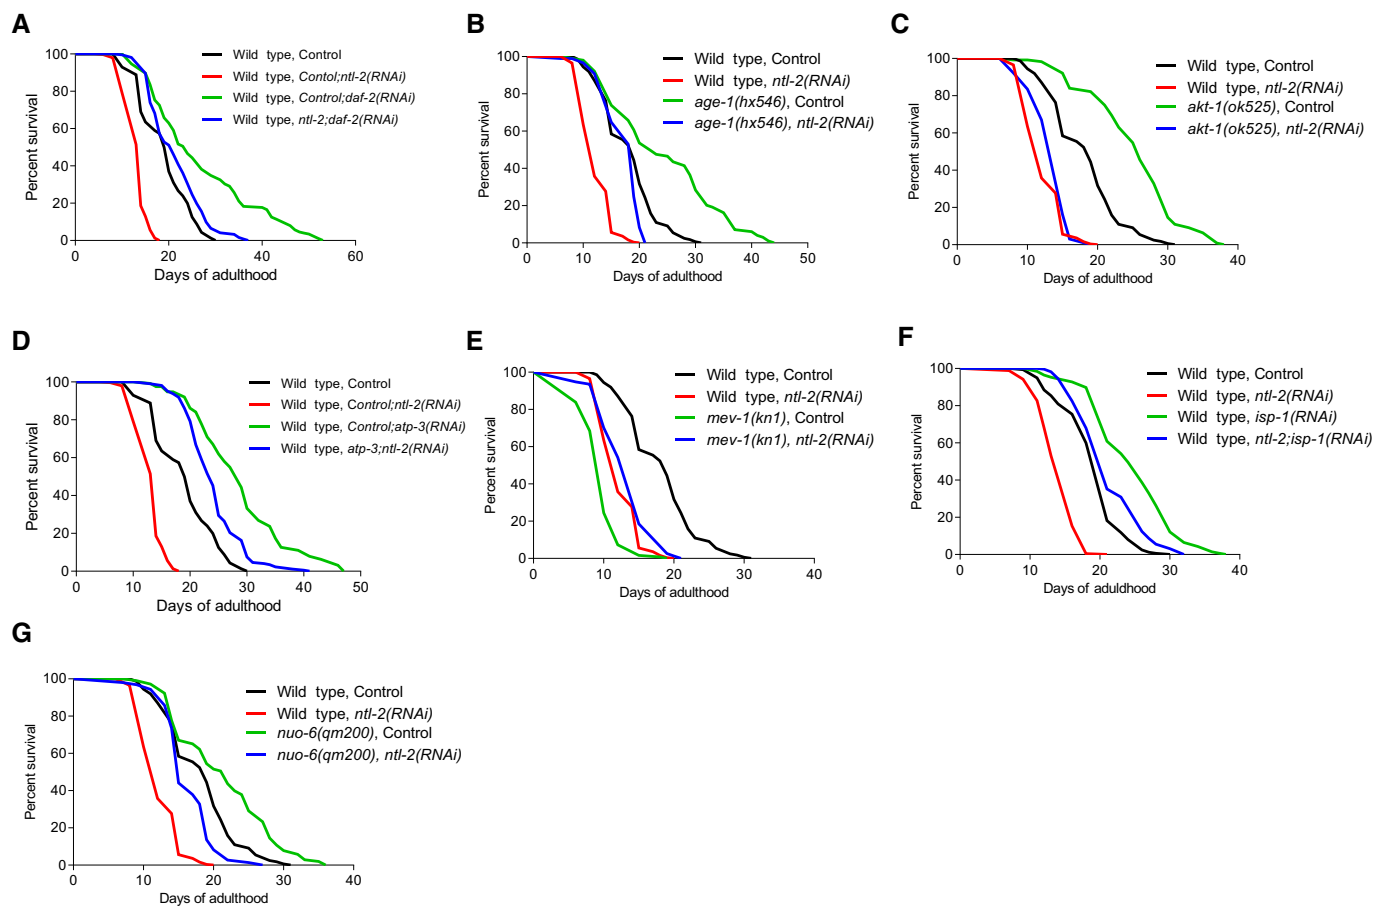

**Figure EV5. Genetic inhibition of *ntl-2* shortens the lifespan of long-lived insulin/IGF-1 pathway mutants and differentially impacts longevity of animals with compromised mitochondrial function.**

- A Knockdown of *ntl-2* shortens the lifespan of *daf-2(RNAi)* long-lived animals.  
 B Knockdown of *ntl-2* shortens the lifespan of *age-1(hx546)* mutants.  
 C Knockdown of *ntl-2* shortens the lifespan of *akt-1(ok525)* mutants.  
 D Knockdown of *atp-3* rescues the short lifespan of NTL-2-depleted animals.  
 E *mev-1(kn1)* mutation is beneficial for the lifespan of NTL-2-depleted animals.  
 F Knockdown of *isp-1* rescues the short lifespan of NTL-2-depleted animals.  
 G *nuo-6(qm200)* mutation is beneficial for the lifespan of NTL-2-depleted animals.

Data information: Lifespan assays were performed at 20°C; detailed data are given in Table EV4.
